# Supplementary material for: Effect of dose and duration of reduction in dietary sodium on blood pressure levels: systematic review and meta-analysis of randomised trials
Source: PubMed Central journal article supplement (PMC7190039; doi:10.1136/bmj.m315), 2020-02-24

**Supplementary figure 1 Mean systolic (right) and diastolic (left) blood pressure (mm Hg) at different levels of sodium intake in 7 studies**

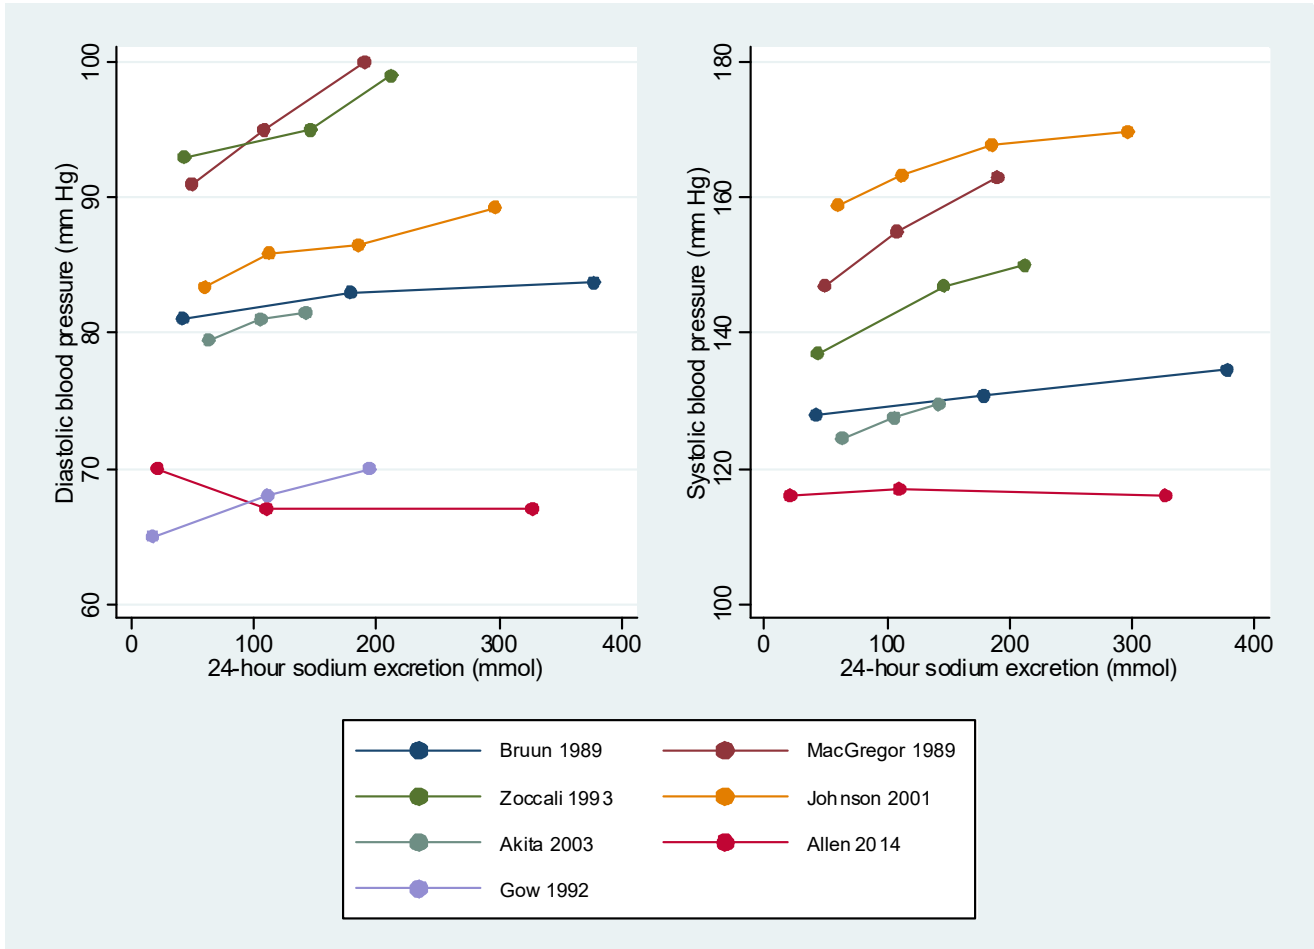

**Supplementary figure 2 Change of systolic (right) and diastolic (left) blood pressure (mm Hg) for each 50 mmol change in sodium intake at different follow up times in 6 studies.**

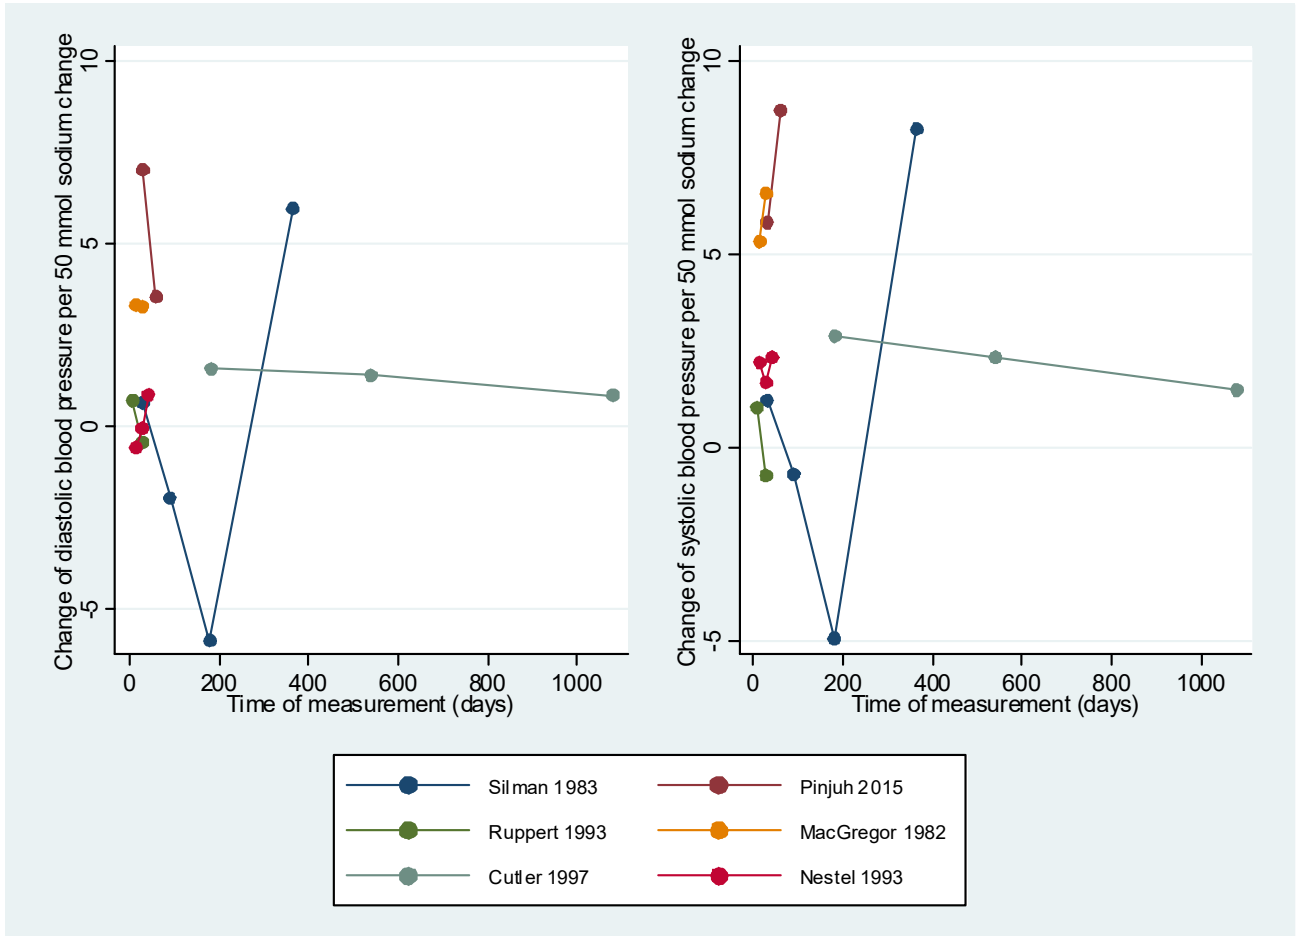

### Supplementary figure 3 Study quality

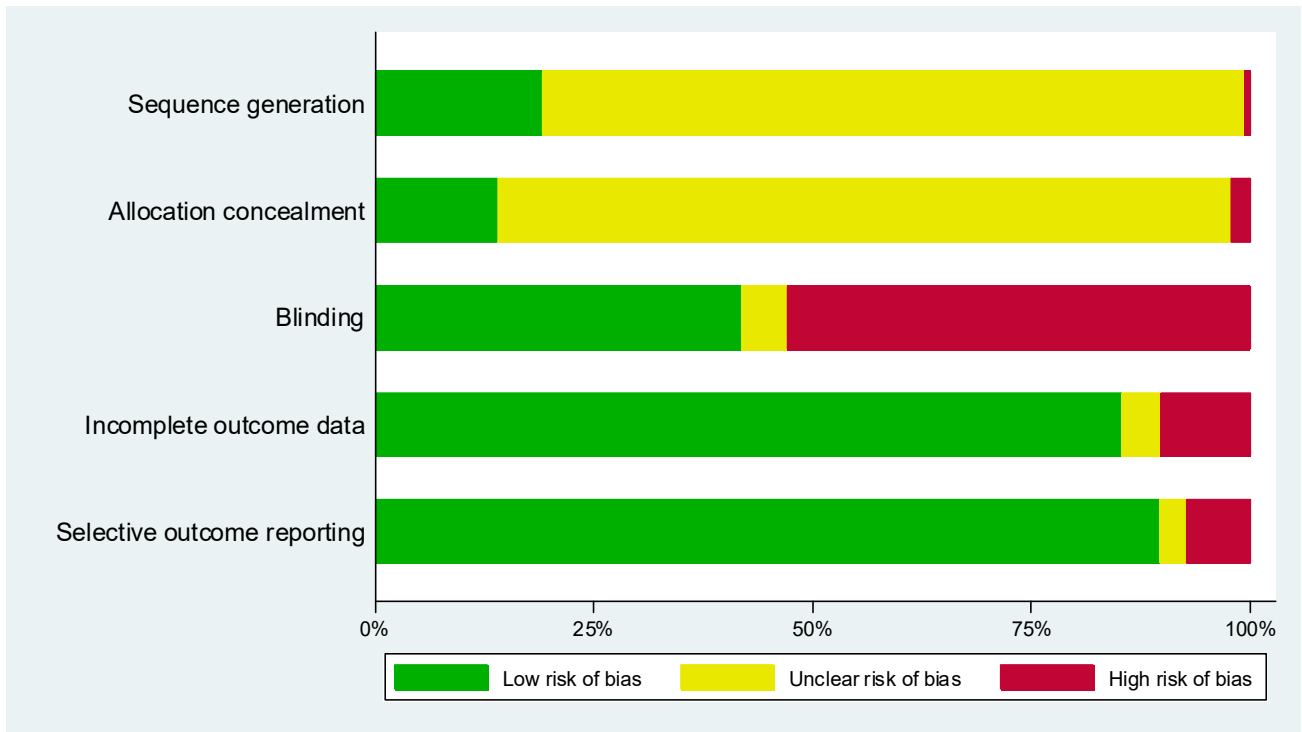

Supplementary figure 4 Funnel plot of systolic blood pressure (A) and diastolic blood pressure (B) change

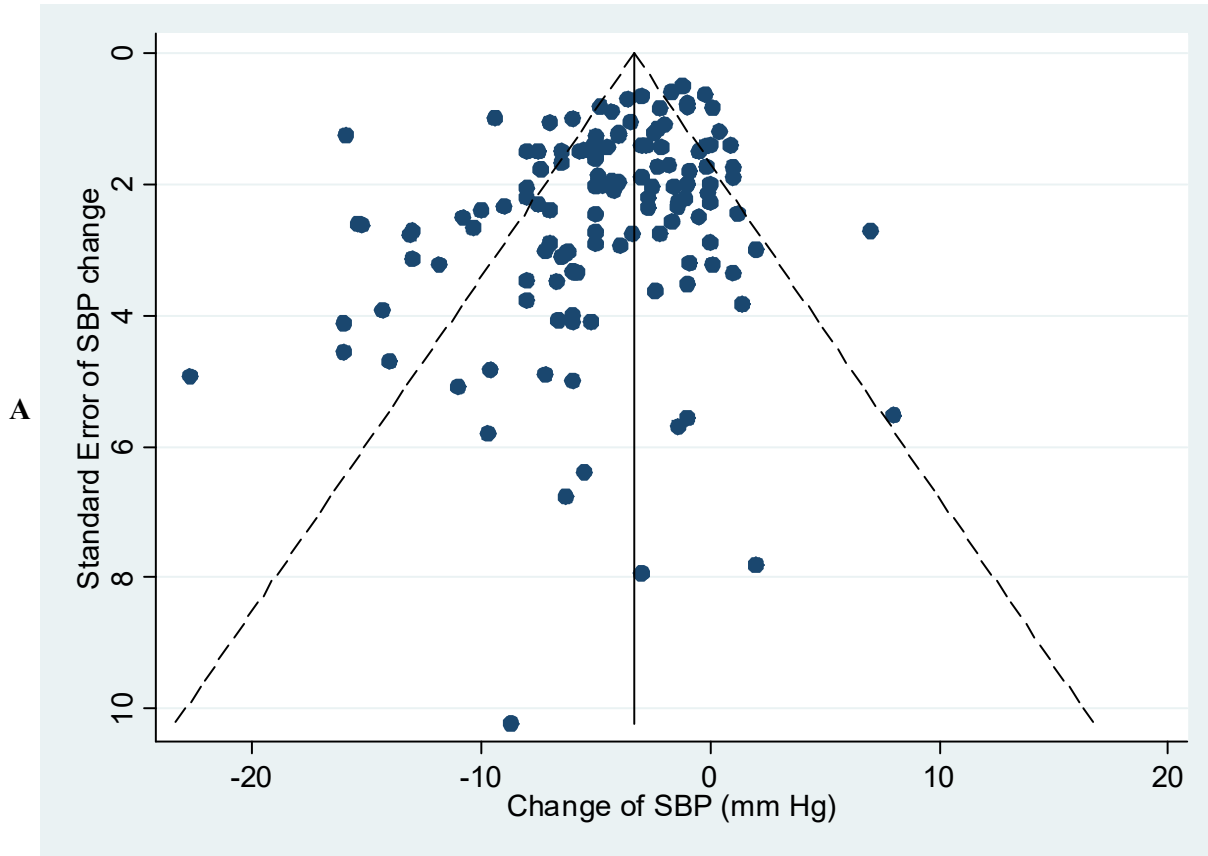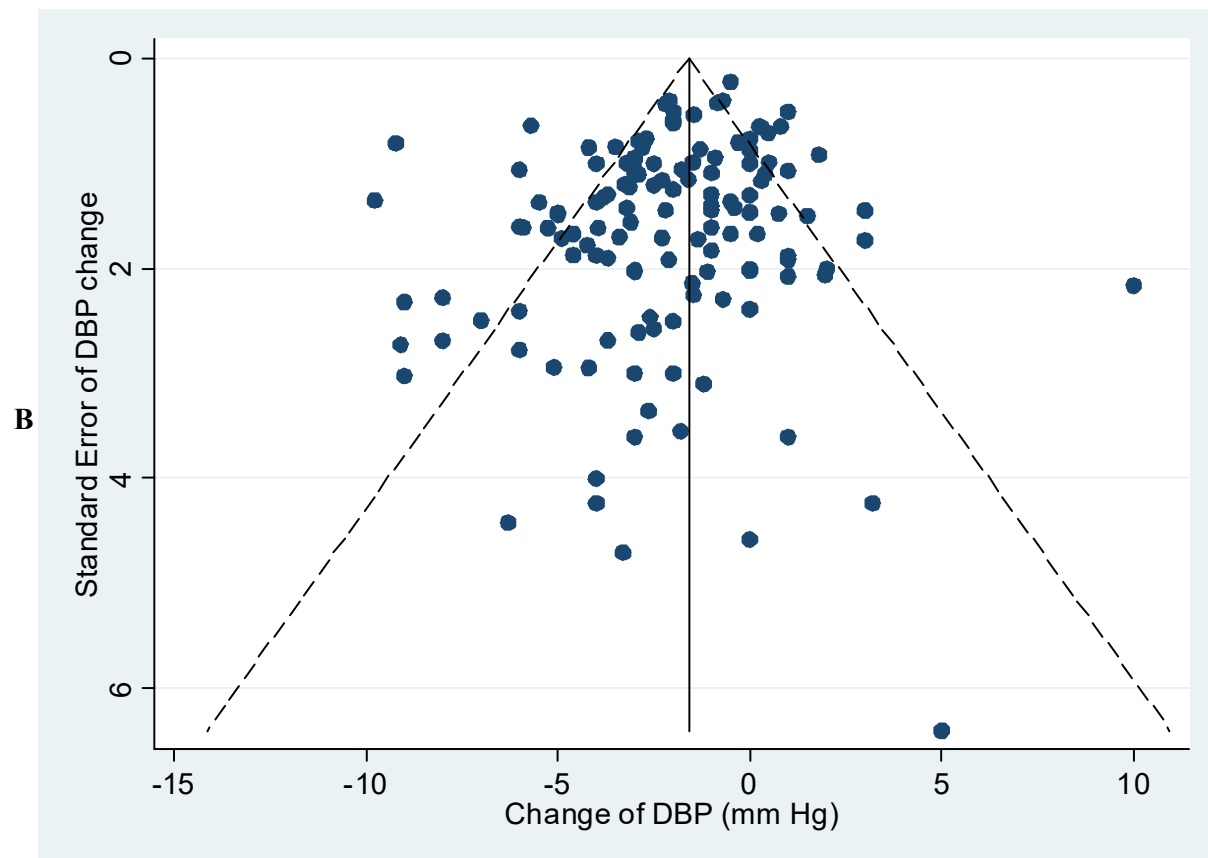

Supplementary figure 5 Contour-enhanced funnel plots for SBP change (A) and DBP change (B)

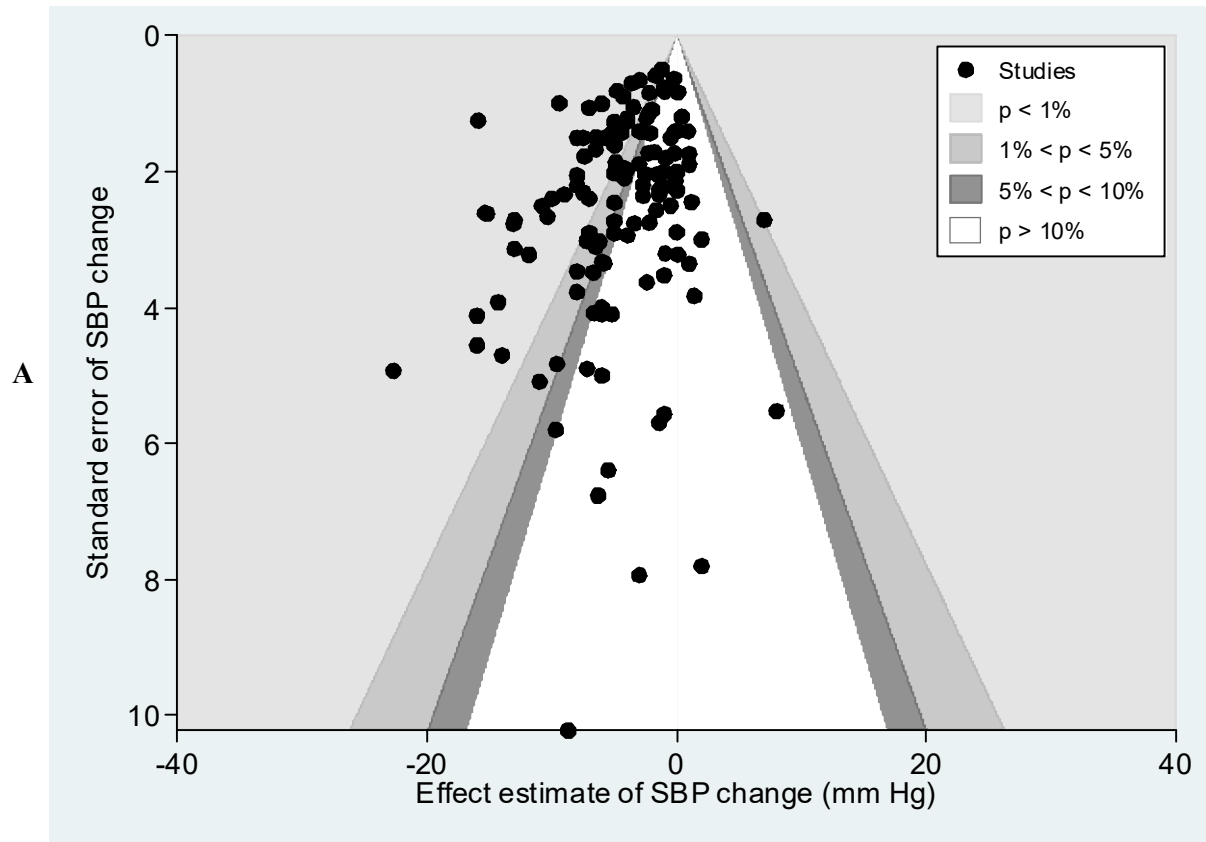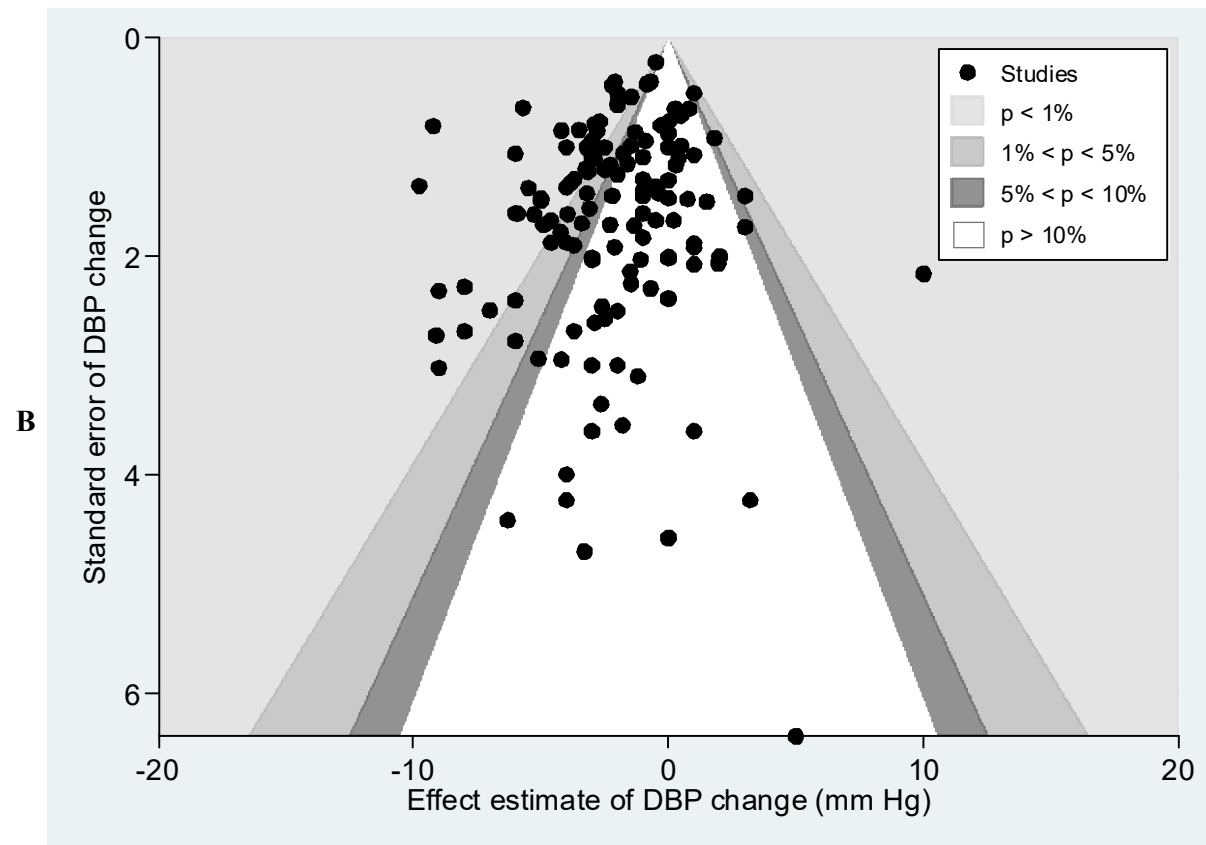

Supplement: hual051597.ww1.pdf [file hual051597.ww1.pdf]
