# Supplementary material for: Effect of dose and duration of reduction in dietary sodium on blood pressure levels: systematic review and meta-analysis of randomised trials
Source: PubMed Central journal article supplement (PMC7190039; doi:10.1136/bmj.m315), 2020-02-24
Supplement: hual051597.ww2.pdf [file hual051597.ww2.pdf]

## Supplementary file 1 Search Strategy to identify randomised salt reduction trials

Ovid MEDLINE(R) from 1946 to January 2019

---

- 1 sodium chloride, dietary/
- 2 exp sodium, dietary/
- 3 diet, sodium-restricted/
- 4 ((sodium or salt) adj3 (restrict\$ or curb\$ or limit\$ or minim\$ or low\$ or reduc\$ or intake or diet\$ or free)).tw.
- 5 or/1-4
- 6 randomized controlled trial.pt.
- 7 controlled clinical trial.pt.
- 8 randomized.tw.
- 9 placebo.tw.
- 10 drug therapy/
- 11 randomly.tw.
- 12 trial.tw.
- 13 groups.tw.
- 14 or/6-13
- 15 animals/ not (humans/ and animals/)
- 16 14 not 15
- 17 5 and 16
- 18 remove duplicates from 17

EMBASE from 1946 to January 2019

---

- 1 sodium chloride, dietary/
- 2 sodium intake/
- 3 sodium restriction/
- 4 ((sodium or salt) adj3 (restrict\$ or curb\$ or limit\$ or minimi\$ or low\$ or reduc\$ or intake or diet\$ or free)).tw.
- 5 or/1-4
- 6 randomized controlled trial/
- 7 crossover procedure/
- 8 double-blind procedure/
- 9 random\$.tw.
- 10 (crossover\$ or cross-over\$).tw.
- 11 placebo\$.tw.
- 12 (doubl\$ adj blind\$).tw.
- 13 assign\$.tw.
- 14 allocat\$.tw.
- 15 or/6-14
- 16 (animal\$ not (human\$ and animal\$)).mp.
- 17 15 not 16
- 18 5 and 17
- 19 remove duplicates from 18

Cochrane Central Register of Controlled Trials (Wiley)

---

- 1 MeSH descriptor Sodium, Chloride, Dietary
- 2 MeSH descriptor Sodium, Dietary explode all trees
- 3 MeSH descriptor Diet, Sodium-Restricted
- 4 sodium near3 (restrict\* or curb\* or limit\* or minimi\* or low\* or reduc\* or intake or diet\* or free):ti,ab
- 5 salt near3 (restrict\* or curb\* or limit\* or minimi\* or low\* or reduc\* or intake or diet\* or free):ti,ab
- 6 #1 or #2 or #3 or #4 or #5

## Supplementary file 2 Study Characteristics

| Study                        | Study country | No. of participants | Mean (range) age (years) | Female (%) | White (%) | Baseline SBP | Design | Study duration (days) | Change in UNa (mmol/24-hour) | Difference in change of BP (mmHg) |                |
|------------------------------|---------------|---------------------|--------------------------|------------|-----------|--------------|--------|-----------------------|------------------------------|-----------------------------------|----------------|
|                              |               |                     |                          |            |           |              |        |                       |                              | Systolic (SE)                     | Diastolic (SE) |
| Parijs 1973 <sup>1</sup>     | Belgium       | 15                  | 41                       | 55         | NR        | 175          | X      | 28                    | -98                          | -6.7 (3.48)                       | 3.2 (4.24)     |
| Mark 1975 <sup>2</sup>       | USA           | 6                   | 27.8 (24-41)             | 0          | NR        | 133          | X      | 10                    | -305                         | -13.1 (2.77)                      | -7.0 (2.50)    |
| Morgan 1981 <sup>3</sup>     | Australia     | 24                  | 39                       | 50         | 100       | -            | P      | 56                    | -88                          | -                                 | -6.0 (2.41)    |
| Skrabal 1981 <sup>4</sup>    | Austria       | 21                  | NR                       | 0          | NR        | 125          | X      | 14                    | -170                         | -2.7 (2.36)                       | -3.0 (2.03)    |
| MacGregor 1982 <sup>5</sup>  | UK            | 19                  | 49 (30-66)               | 26         | 63        | 154          | X      | 28                    | -76                          | -10.0 (2.40)                      | -5.0 (1.47)    |
| Puska 1983 <sup>6</sup>      | Russia        | 72                  | NR                       | NR         | 100       | 153          | P      | 42                    | -117                         | 0.1 (3.23)                        | -0.7 (2.29)    |
| Silman 1983 <sup>7</sup>     | UK            | 25                  | NR                       | NR         | NR        | 155          | P      | 365                   | -53                          | -8.7 (10.22)                      | -6.3 (4.42)    |
| Watt 1983 <sup>8</sup>       | UK            | 18                  | 52 (31-64)               | 67         | 100       | 137          | X      | 28                    | -56                          | -0.5 (1.50)                       | -0.3 (0.80)    |
| Erwteman 1984 <sup>9</sup>   | Netherlands   | 94                  | 46                       | 38         | 76        | 157          | P      | 168                   | -58                          | -2.7 (2.20)                       | -3.4 (1.70)    |
| Gillies 1984 <sup>10</sup>   | Australia     | 24                  | 57                       | 42         | NR        | 147          | X      | 42                    | -77                          | -2.4 (3.63)                       | -2.6 (2.46)    |
| Koolen 1984 <sup>11</sup>    | Netherlands   | 25                  | 41.3 (22-61)             | 40         | 100       | 148          | X      | 14                    | -208                         | -6.2 (3.03)                       | -4.6 (1.87)    |
| Koolen 1984 <sup>12</sup>    | Netherlands   | 20                  | 40.8 (22-61)             | 45         | 100       | 148          | X      | 14                    | -213                         | -6.5 (3.11)                       | -4.9 (1.71)    |
| Maxwell 1984 <sup>13</sup>   | US            | 30                  | 47                       | 50         | NR        | 149          | P      | 7                     | -190                         | -6.3 (6.77)                       | -4.0 (4.24)    |
| Myers 1984 <sup>14</sup>     | Australia     | 125                 | 39                       | NR         | NR        | 123          | X      | 14                    | -147                         | -6.0 (1.00)                       | -4.0 (1.00)    |
| Richards 1984 <sup>15</sup>  | New Zealand   | 12                  | NR                       | 33         | 100       | 150          | X      | 28                    | -105                         | -5.2 (4.10)                       | -1.8 (3.55)    |
| Skrabal 1984 <sup>16</sup>   | Austria       | 52                  | NR                       | 0          | NR        | 120          | X      | 14                    | -149                         | -2.4 (1.22)                       | -1.5 (0.99)    |
| Resnick 1985 <sup>17</sup>   | US            | 12                  | NR                       | NR         | NR        | 159          | X      | 5                     | -200                         | -3.0 (1.89)                       | -1.0 (1.61)    |
| Skrabal 1985 <sup>18</sup>   | Australia     | 62                  | NR                       | NR         | NR        | 120          | X      | 14                    | -153                         | -3.0 (0.65)                       | -1.5 (0.54)    |
| Ashry 1987 <sup>19</sup>     | UK            | 26                  | 26                       | 38         | 100       | 129          | X      | 14                    | -227                         | 0.0 (2.28)                        | -2.5 (2.57)    |
| Grobbee 1987 <sup>20</sup>   | Netherlands   | 40                  | 24                       | 15         | NR        | 137          | X      | 42                    | -72                          | -0.9 (1.80)                       | 0.2 (1.67)     |
| MacGregor 1987 <sup>21</sup> | UK            | 15                  | 52 (33-71)               | 27         | 67        | 150          | X      | 30                    | -100                         | -13.0 (3.14)                      | -9.0 (3.02)    |
| Morgan 1987 <sup>22</sup>    | Australia     | 20                  | 60.5 (50-65)             | 0          | NR        | 143          | P      | 60                    | -62                          | -6.0 (5.00)                       | -4.2 (2.95)    |
| Lawton 1988 <sup>23</sup>    | US            | 22                  | 24.5 (20-31)             | 0          | 100       | 115          | X      | 6                     | -319                         | -1.6 (2.04)                       | 0.0 (1.47)     |
| Morgan 1988 <sup>24</sup>    | Australia     | 16                  | 63 (48-69)               | 0          | NR        | 173          | X      | 14                    | -50                          | -3.0 (1.41)                       | -4.0 (1.88)    |
| Morgan 1988 <sup>25</sup>    | Australia     | 8                   | NR                       | NR         | NR        | 156          | X      | 14                    | -67                          | -7.0 (1.06)                       | -6.0 (1.06)    |
| Nowson 1988 <sup>26</sup>    | Australia     | 107                 | 52                       | 15         | 100       | 150          | P      | 84                    | -47                          | -5.1 (1.42)                       | -4.2 (0.85)    |
| Nowson 1988 <sup>26</sup>    | Australia     | 105                 | 52                       | 15         | 100       | 149          | P      | 84                    | -51                          | -0.2 (1.42)                       | 0.5 (0.99)     |
| Staessen 1988 <sup>27</sup>  | Belgium       | 1510                | 41                       | 48         | NR        | 131          | P      | 1825                  | -12                          | -0.2 (1.73)                       | -1.0 (1.09)    |

| Study                         | Study country | No. of participants | Mean (range) age (years) | Female (%) | White (%) | Baseline SBP | Design | Study duration (days) | Change in UNa (mmol/24-hour) | Difference in change of BP (mmHg) |                |
|-------------------------------|---------------|---------------------|--------------------------|------------|-----------|--------------|--------|-----------------------|------------------------------|-----------------------------------|----------------|
|                               |               |                     |                          |            |           |              |        |                       |                              | Systolic (SE)                     | Diastolic (SE) |
| Chalmers 1989 <sup>28</sup>   | Australia     | 88                  | 59                       | 17         | 100       | 152          | X      | 56                    | -67                          | -3.6 (0.70)                       | -2.1 (0.40)    |
| Chalmers 1989 <sup>29</sup>   | Australia     | 108                 | 59                       | 17         | 100       | 144          | P      | 56                    | -71                          | -5.5 (1.48)                       | -2.8 (0.85)    |
| Dodson 1989 <sup>30</sup>     | UK            | 9                   | 62                       | 33         | NR        | 171          | X      | 30                    | -76                          | -9.7 (5.80)                       | -5.1 (2.94)    |
| Hargreaves 1989 <sup>31</sup> | Australia     | 8                   | 23                       | 0          | NR        | 129          | X      | 14                    | -106                         | -6.0 (4.00)                       | -3.0 (3.00)    |
| MacGregor 1989 <sup>32</sup>  | UK            | 20                  | 57 (42-72)               | 45         | 75        | 163          | X      | 30                    | -141                         | -16.0 (4.12)                      | -9.0 (2.32)    |
| Bruun 1990 <sup>33</sup>      | Denmark       | 22                  | 46.5 (29-67)             | 36         | NR        | 135          | X      | 4                     | -336                         | -6.6 (4.08)                       | -2.6 (3.36)    |
| Parker 1990 <sup>34</sup>     | Australia     | 59                  | 52                       | 0          | NR        | 138          | P      | 28                    | -93                          | 1.0 (1.90)                        | 0.4 (1.10)     |
| Río 1990 <sup>35</sup>        | Spain         | 15                  | 49.2 (36-65)             | 47         | 100       | 149          | X      | 14                    | -100                         | -3.4 (2.76)                       | -1.1 (2.03)    |
| Sharma 1990 <sup>36</sup>     | Germany       | 15                  | 24 (20-31)               | 0          | NR        | 107          | X      | 7                     | -192                         | -0.9 (3.20)                       | -3.7 (2.69)    |
| Sharma 1990 <sup>37</sup>     | Germany       | 40                  | 25 (20-31)               | 0          | NR        | 113          | X      | 7                     | -214                         | -2.1 (1.43)                       | -3.1 (1.22)    |
| Carney 1991 <sup>38</sup>     | Australia     | 11                  | 54 (30-65)               | 55         | NR        | 144          | X      | 42                    | -102                         | -1.0 (5.57)                       | 1.0 (3.61)     |
| Creager 1991 <sup>39</sup>    | US            | 17                  | 30                       | 0          | NR        | 122          | X      | 5                     | -168                         | 2.0 (3.00)                        | 2.0 (2.00)     |
| Sharma 1991 <sup>40</sup>     | Australia     | 23                  | 24.9 (23-29)             | 0          | NR        | 120          | X      | 6                     | -246                         | -4.5 (1.43)                       | -2.3 (1.16)    |
| Singer 1991 <sup>41</sup>     | UK            | 21                  | 54                       | 38         | 71        | 147          | X      | 30                    | -91                          | -9.0 (2.34)                       | -3.0 (1.05)    |
| Alli 1992 <sup>42</sup>       | Italy         | 56                  | 48                       | 57         | NR        | 149          | P      | 365                   | 8                            | -6.3 (3.06)                       | -3.8 (1.32)    |
| Arroll 1992 <sup>43</sup>     | New Zealand   | 181                 | 55                       | 48         | NR        | 145          | P      | 180                   | -1                           | -0.5 (2.50)                       | 1.5 (1.50)     |
| Benetos 1992 <sup>44</sup>    | France        | 20                  | 42                       | 55         | 100       | 149          | X      | 28                    | -78                          | -6.5 (1.67)                       | -3.7 (1.29)    |
| Cobiac 1992 <sup>45</sup>     | Australia     | 106                 | 67                       | 34         | 100       | 132          | P      | 28                    | -71                          | -2.8 (1.41)                       | -1.3 (0.86)    |
| Gow 1992 <sup>46</sup>        | UK            | 9                   | NR                       | 0          | NR        | 120          | X      | 7                     | -94                          | -8.0 (3.47)                       | -3.0 (3.61)    |
| Huggins 1992 <sup>47</sup>    | Australia     | 9                   | NR                       | 22         | NR        | 112          | X      | 14                    | -97                          | -1.0 (2.00)                       | -2.0 (3.00)    |
| Cutler 1992 <sup>48</sup>     | US            | 744                 | 43                       | 29         | 82        | 125          | P      | 540                   | -44                          | -1.7 (0.59)                       | -0.9 (0.42)    |
| Fotherby 1993 <sup>49</sup>   | UK            | 17                  | 73 (66-79)               | 78         | 100       | 179          | X      | 35                    | -79                          | -8.0 (3.77)                       | 0.0 (2.39)     |
| Nestel 1993 <sup>50</sup>     | Australia     | 66                  | 66                       | 45         | 100       | 146          | P      | 42                    | -84                          | -3.9 (2.94)                       | -1.5 (2.25)    |
| Redon-Mas 1993 <sup>51</sup>  | Spain         | 418                 | 55                       | 46         | NR        | 163          | P      | 28                    | -109                         | 0.9 (1.41)                        | 1.8 (0.92)     |
| Río 1993 <sup>52</sup>        | Spain         | 30                  | 49.2 (30-65)             | 43         | NR        | 156          | X      | 14                    | -151                         | -1.4 (2.26)                       | -0.5 (1.36)    |
| Ruilope 1993 <sup>53</sup>    | Spain         | 19                  | NR                       | NR         | NR        | 157          | X      | 21                    | -67                          | -5.9 (3.35)                       | -5.3 (1.62)    |
| Ruppert 1993 <sup>54</sup>    | Germany       | 163                 | 38                       | 40         | NR        | 113          | X      | 7                     | -274                         | -2.2 (0.84)                       | 1.0 (0.51)     |
| Sharma 1993 <sup>55</sup>     | Germany       | 16                  | NR                       | 0          | NR        | 111          | X      | 7                     | -224                         | -1.4 (5.70)                       | -0.5 (1.67)    |
| Sharma 1993 <sup>56</sup>     | Germany       | 15                  | 25.3 (20-31)             | 0          | NR        | 106          | X      | 7                     | -174                         | -0.1 (2.13)                       | -2.1 (1.92)    |
| Sharma 1993 <sup>57</sup>     | Germany       | 18                  | 25.1 (21-28)             | 0          | NR        | 111          | X      | 7                     | -218                         | -1.8 (1.71)                       | -0.4 (1.42)    |

| Study                        | Study country | No. of participants | Mean (range) age (years) | Female (%) | White (%) | Baseline SBP | Design | Study duration (days) | Change in UNa (mmol/24-hour) | Difference in change of BP (mmHg) |                |
|------------------------------|---------------|---------------------|--------------------------|------------|-----------|--------------|--------|-----------------------|------------------------------|-----------------------------------|----------------|
|                              |               |                     |                          |            |           |              |        |                       |                              | Systolic (SE)                     | Diastolic (SE) |
| Zoccali 1993 <sup>58</sup>   | Italy         | 14                  | 47 (30-65)               | 0          | NR        | 150          | X      | 7                     | -169                         | -13.0 (2.71)                      | -6.0 (1.60)    |
| Howe 1994 <sup>59</sup>      | Australia     | 56                  | 55                       | 45         | NR        | 145          | P      | 42                    | -78                          | -4.2 (2.09)                       | -1.5 (2.14)    |
| Iwaoka 1994 <sup>60</sup>    | Japan         | 31                  | 46                       | 45         | 0         | 149          | X      | 7                     | -266                         | -14.3 (3.92)                      | -4.6 (1.67)    |
| MacFadyen 1994 <sup>61</sup> | UK            | 12                  | NR                       | 0          | NR        | 114          | X      | 3                     | -50                          | 7.0 (2.71)                        | 10.0 (2.16)    |
| Zoccali 1994 <sup>62</sup>   | Italy         | 15                  | 45 (30-65)               | 13         | 100       | 144          | X      | 7                     | -163                         | -14.0 (4.70)                      | -8.0 (2.69)    |
| Doig 1995 <sup>63</sup>      | US            | 8                   | 25                       | 0          | NR        | -            | X      | 4                     | -112                         | -2.3 (1.73)                       | 0.0 (2.01)     |
| Draaijer 1995 <sup>64</sup>  | Netherlands   | 10                  | 41                       | 0          | NR        | 159          | X      | 7                     | -259                         | -7.5 (2.31)                       | -0.5 (0.22)    |
| Stein 1995 <sup>65</sup>     | US            | 7                   | 34                       | 0          | 100       | 123          | X      | 5                     | -183                         | 1.4 (3.83)                        | -1.2 (3.10)    |
| Weir 1995 <sup>66</sup>      | US            | 22                  | 60                       | 36         | 41        | 160          | X      | 14                    | -136                         | -2.2 (2.75)                       | -1.4 (1.72)    |
| Bellini 1996 <sup>67</sup>   | Italy         | 43                  | 46                       | 0          | 100       | 167          | X      | 14                    | -217                         | -10.3 (2.67)                      | -9.8 (1.35)    |
| Ferri 1996 <sup>68</sup>     | Italy         | 61                  | 47                       | 0          | 100       | 169          | X      | 14                    | -265                         | -7.4 (1.78)                       | -3.5 (0.84)    |
| Grey 1996 <sup>69</sup>      | New Zealand   | 34                  | 23                       | 0          | 100       | 116          | X      | 7                     | -133                         | 1.0 (1.74)                        | 1.0 (1.07)     |
| Inoue 1996 <sup>70</sup>     | UK            | 14                  | 46 (21-59)               | 57         | 50        | 153          | X      | 7                     | -293                         | -15.2 (2.62)                      | -3.7 (1.9)     |
| Ishimitsu 1996 <sup>71</sup> | Japan         | 30                  | 54                       | 53         | 0         | 147          | X      | 7                     | -193                         | -11.8 (3.23)                      | -4.2 (1.78)    |
| Schorr 1996 <sup>72</sup>    | Germany       | 16                  | 64                       | 56         | 100       | 134          | X      | 28                    | -71                          | -7.2 (4.90)                       | -2.9 (2.61)    |
| Zoccali 1996 <sup>73</sup>   | Italy         | 14                  | 47 (37-59)               | 14         | NR        | 140          | X      | 7                     | -145                         | -11.0 (5.09)                      | -6.0 (2.78)    |
| Cappuccio 1997 <sup>74</sup> | UK            | 47                  | 66.8 (60-78)             | 49         | 89        | 163          | X      | 30                    | -83                          | -7.2 (3.02)                       | -3.2 (1.42)    |
| Cutler 1997 <sup>75</sup>    | US            | 1190                | 44                       | 33         | 80        | 127          | P      | 1095                  | -40                          | -1.2 (0.50)                       | -0.7 (0.40)    |
| McCarron 1997 <sup>76</sup>  | US            | 99                  | 52                       | 42         | 73        | 139          | X      | 28                    | -55                          | -4.9 (1.87)                       | -2.9 (1.10)    |
| Meland 1997 <sup>77</sup>    | Norway        | 16                  | 50 (20-69)               | 19         | 100       | 145          | X      | 56                    | -66                          | -4.0 (1.97)                       | -2.0 (1.25)    |
| Schorr 1997 <sup>78</sup>    | Germany       | 90                  | 25                       | 0          | NR        | 110          | X      | 7                     | -196                         | 0.1 (0.83)                        | 0.8 (0.65)     |
| Yamamoto 1997 <sup>79</sup>  | Japan         | 36                  | 53.3 (40-69)             | 81         | 0         | 148          | P      | 49                    | -32                          | -5.5 (6.40)                       | -3.3 (4.71)    |
| Foo 1998 <sup>80</sup>       | UK            | 18                  | 51                       | 56         | NR        | 127          | X      | 6                     | -149                         | -5.8 (3.35)                       | 2.0 (2.06)     |
| Gomi 1998 <sup>81</sup>      | Japan         | 12                  | 51.8 (38-65)             | 33         | 0         | 139          | X      | 7                     | -70                          | -1.1 (2.22)                       | 0.3 (1.16)     |
| Herlitz 1998 <sup>82</sup>   | Sweden        | 6                   | NR                       | 0          | NR        | 129          | X      | 4                     | -98                          | -5.0 (1.62)                       | -3.0 (0.97)    |
| Wing 1998 <sup>83</sup>      | Australia     | 17                  | 61 (37-74)               | 18         | NR        | 160          | X      | 42                    | -59                          | -7.0 (2.40)                       | -4.0 (1.37)    |
| Davrath 1999 <sup>84</sup>   | US            | 8                   | 25                       | 0          | NR        | 124          | X      | 5                     | -96                          | 8.0 (5.52)                        | 5.0 (6.40)     |
| Schorr 1999 <sup>85</sup>    | Germany       | 187                 | 25.1 (20-30)             | 0          | 100       | 111          | X      | 7                     | -207                         | -0.2 (0.63)                       | 0.3 (0.65)     |
| Uzu 1999 <sup>86</sup>       | Japan         | 70                  | 50 (27-69)               | 33         | 0         | 153          | X      | 7                     | -173                         | -15.4 (2.61)                      | -5.5 (1.37)    |
| Boero 2000 <sup>87</sup>     | Italy         | 13                  | 51 (21-64)               | 23         | NR        | 132          | X      | 14                    | -209                         | -4.0 (1.26)                       | -3.0 (0.94)    |

| Study                               | Study country | No. of participants | Mean (range) age (years) | Female (%) | White (%) | Baseline SBP | Design | Study duration (days) | Change in UNa (mmol/24-hour) | Difference in change of BP (mmHg) |                |
|-------------------------------------|---------------|---------------------|--------------------------|------------|-----------|--------------|--------|-----------------------|------------------------------|-----------------------------------|----------------|
|                                     |               |                     |                          |            |           |              |        |                       |                              | Systolic (SE)                     | Diastolic (SE) |
| Ames 2001 <sup>88</sup>             | US            | 21                  | 60                       | 52         | 62        | 154          | X      | 28                    | -126                         | -6.0 (3.33)                       | -2.3 (1.71)    |
| Appel 2001 <sup>89</sup>            | US            | 681                 | 66                       | 47         | 76        | 128          | P      | 90                    | -40                          | -4.3 (0.89)                       | -2.0 (0.61)    |
| Johnson 2001 <sup>90</sup>          | Australia     | 46                  | 69                       | NR         | NR        | -            | X      | 14                    | -237                         | -10.8 (2.51)                      | -5.9 (1.61)    |
| Akita 2003 <sup>91</sup>            | US            | 375                 | 48                       | 57         | 39        | 129          | X      | 30                    | -79                          | -5.0 (1.27)                       | -2.0 (0.51)    |
| Dishy 2003 <sup>92</sup>            | US            | 25                  | 34                       | 40         | 84        | 112          | X      | 6                     | -300                         | 2.0 (7.81)                        | 1.0 (1.88)     |
| Nowson 2003 <sup>93</sup>           | Australia     | 92                  | 45                       | 63         | NR        | 118          | X      | 28                    | -88                          | 0.4 (1.20)                        | 0.0 (1.00)     |
| Pechere-Bertschi 2003 <sup>94</sup> | Switzerland   | 27                  | 26 (20-40)               | 100        | 100       | 102          | X      | 7                     | -296                         | -1.4 (2.34)                       | 0.8 (1.48)     |
| Perry 2003 <sup>95</sup>            | UK            | 15                  | 26                       | 0          | NR        | 115          | X      | 5                     | -105                         | 0.0 (2.89)                        | -2.0 (2.50)    |
| Beeks 2004 <sup>96</sup>            | Netherlands   | 117                 | 53.6 (43-63)             | 43         | NR        | 166          | X      | 7                     | -99                          | 1.2 (2.45)                        | -1.8 (1.06)    |
| Berge-Landry 2004 <sup>97</sup>     | US            | 48                  | 51                       | 21         | 71        | 144          | X      | 28                    | -285                         | -16.0 (4.56)                      | -8.0 (2.28)    |
| Gates 2004 <sup>98</sup>            | US            | 12                  | 64                       | 50         | 100       | 144          | X      | 28                    | -89                          | -7.0 (2.90)                       | -1.0 (1.83)    |
| Forrester 2005 <sup>99</sup>        | Nigeria       | 58                  | 47                       | 41         | 0         | 122          | X      | 21                    | -72                          | -4.8 (1.45)                       | -3.2 (1.00)    |
| Forrester 2005 <sup>99</sup>        | Jamaica       | 56                  | 41                       | 39         | 0         | 114          | X      | 21                    | -79                          | -5.1 (1.42)                       | -2.2 (1.45)    |
| Swift 2005 <sup>100</sup>           | UK            | 40                  | 50                       | 58         | 0         | 159          | X      | 28                    | -78                          | -8.0 (2.06)                       | -3.0 (1.11)    |
| Cappuccio 2006 <sup>101</sup>       | Ghana         | 1013                | 55                       | 62         | 0         | 128          | P      | 180                   | 6                            | -2.5 (2.04)                       | -4.0 (1.61)    |
| Ho 2007 <sup>102</sup>              | Australia     | 25                  | 49                       | 68         | NR        | 130          | X      | 14                    | -210                         | -5.7 (1.50)                       | -2.5 (1.00)    |
| Melander 2007 <sup>103</sup>        | Sweden        | 39                  | 53                       | 49         | 100       | 132          | X      | 28                    | -89                          | -6.5 (1.50)                       | -3.3 (1.20)    |
| Townsend 2007 <sup>104</sup>        | US            | 20                  | 30                       | 35         | 40        | 117          | X      | 7                     | -171                         | -6.0 (4.10)                       | -4.0 (4.00)    |
| Jessani 2008 <sup>105</sup>         | Pakistan      | 184                 | 50                       | 53         | 0         | 122          | X      | 7                     | -81                          | -1.0 (0.77)                       | 0.0 (0.77)     |
| Tzemos 2008 <sup>106</sup>          | UK            | 16                  | 27                       | 0          | 100       | 121          | X      | 5                     | -149                         | -4.0 (1.22)                       | -1.0 (1.45)    |
| Visser 2008 <sup>107</sup>          | Netherlands   | 34                  | 27                       | 0          | 100       | 122          | X      | 7                     | -181                         | -5.0 (2.46)                       | -1.0 (1.29)    |
| Dickinson 2009 <sup>108</sup>       | Australia     | 29                  | 53                       | 76         | NR        | 117          | X      | 14                    | -92                          | -5.0 (2.03)                       | -1.0 (1.40)    |
| He 2009 <sup>109</sup>              | UK            | 169                 | 50                       | 33         | 42        | 146          | X      | 42                    | -55                          | -4.8 (0.82)                       | -2.2 (0.43)    |
| Meland 2009 <sup>110</sup>          | Norway        | 46                  | 56 (20-75)               | 26         | NR        | 128          | P      | 56                    | -38                          | -5.0 (2.73)                       | -5.0 (1.49)    |
| Paulsen 2009 <sup>111</sup>         | UK            | 22                  | 24 (22-30)               | 45         | NR        | 111          | X      | 4                     | -78                          | -1.0 (3.52)                       | 1.0 (2.07)     |
| Pimenta 2009 <sup>112</sup>         | US            | 12                  | 56                       | 67         | 50        | 146          | X      | 7                     | -207                         | -22.7 (4.93)                      | -9.1 (2.73)    |
| Weir 2010 <sup>113</sup>            | USA           | 115                 | 52                       | 45         | 86        | 134          | X      | 28                    | -123                         | -9.4 (0.99)                       | -5.7 (0.64)    |
| Zanchi 2010 <sup>114</sup>          | Switzerland   | 9                   | NR                       | 0          | NR        | 117          | X      | 7                     | -250                         | -3.0 (7.94)                       | 0.0 (4.58)     |
| Starmans-Kool 2011 <sup>115</sup>   | UK            | 10                  | 32 (22-40)               | 0          | NR        | 114          | X      | 14                    | -97                          | -2.0 (1.09)                       | 0.0 (2.39)     |

| Study                         | Study country          | No. of participants | Mean (range) age (years) | Female (%) | White (%) | Baseline SBP | Design | Study duration (days) | Change in UNa (mmol/24-hour) | Difference in change of BP (mmHg) |                |
|-------------------------------|------------------------|---------------------|--------------------------|------------|-----------|--------------|--------|-----------------------|------------------------------|-----------------------------------|----------------|
|                               |                        |                     |                          |            |           |              |        |                       |                              | Systolic (SE)                     | Diastolic (SE) |
| Carey 2012 <sup>116</sup>     | US                     | 185                 | 47.2 (18-70)             | 61         | 100       | 123          | X      | 7                     | -203                         | -3.5 (1.05)                       | 0.3 (0.65)     |
| Carey 2012 <sup>116</sup>     | US, France             | 211                 | 49                       | 39         | 100       | 147          | X      | 6                     | -212                         | -15.9 (1.25)                      | -9.2 (0.81)    |
| Graffe 2012 <sup>117</sup>    | Denmark                | 21                  | 26                       | 52         | 100       | 110          | X      | 4                     | -172                         | 1.0 (3.36)                        | 1.0 (1.92)     |
| Bonfils 2013 <sup>118</sup>   | Denmark                | 36                  | 40                       | 58         | NR        | 124          | X      | 5                     | -140                         | -1.7 (2.57)                       | 0.0 (1.30)     |
| Mallamaci 2013 <sup>119</sup> | Italy                  | 32                  | 48                       | 28         | NR        | 136          | X      | 14                    | -165                         | -8.0 (2.20)                       | -3.0 (0.96)    |
| Allen 2014 <sup>120</sup>     | US                     | 70                  | 24                       | 63         | NR        | 116          | X      | 5                     | -306                         | 0.0 (1.40)                        | 3.0 (1.45)     |
| Cavka 2015 <sup>121</sup>     | Croatia                | 54                  | 20                       | 100        | NR        | 105          | P      | 7                     | -141                         | -5.0 (2.91)                       | -3.0 (2.01)    |
| Gijssbers 2015 <sup>122</sup> | Netherlands            | 36                  | 66                       | 33         | NR        | 137          | X      | 28                    | -98                          | -7.5 (1.50)                       | -2.7 (0.76)    |
| He 2015 <sup>123</sup>        | China                  | 553                 | 44                       | 52         | 0         | 126          | P      | 105                   | -50                          | -2.3 (1.16)                       | -0.9 (0.94)    |
| Markota 2015 <sup>124</sup>   | Bosnia and Herzegovina | 150                 | 59                       | 51         | NR        | 175          | P      | 60                    | -28                          | -4.9 (1.97)                       | -2.0 (0.60)    |
| Matthews 2015 <sup>125</sup>  | US                     | 20                  | 41                       | 50         | 70        | 120          | X      | 7                     | -205                         | -5.0 (1.58)                       | -2.5 (1.21)    |
| Riphagen 2016 <sup>126</sup>  | Netherlands            | 35                  | 66                       | 34         | 100       | 137          | X      | 28                    | -99                          | -8.0 (1.50)                       | -2.9 (0.79)    |
| Suckling 2016 <sup>127</sup>  | UK                     | 46                  | 58                       | 48         | 70        | 136          | X      | 42                    | -49                          | -4.3 (1.95)                       | -1.6 (1.15)    |
| Brian 2017 <sup>128</sup>     | US                     | 80                  | 38                       | 51         | 80        | 116          | X      | 7                     | -287                         | -1.0 (0.78)                       | 0.5 (0.71)     |
| Gefke 2017 <sup>129</sup>     | Sweden                 | 10                  | 25 (22-30)               | 50         | 100       | 114          | X      | 3                     | -169                         | -1.0 (2.00)                       | 0.0 (0.88)     |
| Babcock 2018 <sup>130</sup>   | US                     | 21                  | 38 (20-59)               | 50         | NR        | 113          | X      | 7                     | -177                         | 0.0 (2.00)                        | 3.0 (1.73)     |
| Parvanova 2018 <sup>131</sup> | Italy                  | 115                 | 64                       | 11         | NR        | 146          | P      | 90                    | -44                          | -4.7 (2.02)                       | -3.0 (1.07)    |
| Rorije 2018 <sup>132</sup>    | Italy                  | 12                  | 23 (18-31)               | 0          | NR        | 118          | X      | 8                     | -322                         | -1.0 (0.82)                       | 0.0 (2.02)     |
| Wang 2018 <sup>133</sup>      | China                  | 90                  | 51                       | 64         | 0         | 122          | X      | 7                     | -176                         | -9.6 (4.83)                       | -3.1 (1.56)    |

### Abbreviations and symbols:

SBP: systolic blood pressure; Una: urinary sodium excretion; BP: blood pressure; SE: standard error; X: crossover design; P: parallel design

### Supplementary file 3 Risk of bias assessment of included studies

| Study                        | Sequence generation                        | Allocation concealment                                                                                                                                                                             | Blinding of participants, personnel and outcome assessors  | Incomplete outcome data                                        | Selective reporting          |
|------------------------------|--------------------------------------------|----------------------------------------------------------------------------------------------------------------------------------------------------------------------------------------------------|------------------------------------------------------------|----------------------------------------------------------------|------------------------------|
| Parijs 1973 <sup>1</sup>     | High risk (each patient received a number) | High risk (Those with uneven numbers were instructed to take a low-sodium diet during the first period and a high-sodium diet during the second period and vice versa for those with even numbers) | High risk (open study)                                     | High risk (7 out of 22 participants were lost in the analysis) | Low risk                     |
| Mark 1975 <sup>2</sup>       | Unclear                                    | Unclear                                                                                                                                                                                            | High risk (open study)                                     | Low risk (no loss to follow up)                                | Low risk                     |
| Morgan 1981 <sup>3</sup>     | Unclear                                    | Unclear                                                                                                                                                                                            | High risk (open study with BP observer blinded only)       | Low risk (no loss to follow up)                                | High risk (SBP not reported) |
| Skrabal 1981 <sup>4</sup>    | Unclear                                    | Unclear                                                                                                                                                                                            | High risk (open study)                                     | Low risk (no loss to follow up)                                | Low risk                     |
| MacGregor 1982 <sup>5</sup>  | Unclear                                    | Unclear                                                                                                                                                                                            | Low risk (double blinding)                                 | Low risk                                                       | Low risk                     |
| Puska 1983 <sup>6</sup>      | Unclear                                    | Unclear                                                                                                                                                                                            | High risk (open study with BP observer blinded only)       | Low risk (4 out of 76 lost to follow up)                       | Low risk                     |
| Silman 1983 <sup>7</sup>     | Unclear                                    | Unclear                                                                                                                                                                                            | High risk (open study with BP observer blinded only)       | Low risk (no loss to follow up)                                | Low risk                     |
| Watt 1983 <sup>8</sup>       | Unclear                                    | Unclear                                                                                                                                                                                            | Low risk (double blinding)                                 | Low risk (2 out of 20 lost)                                    | Low risk                     |
| Erwteman 1984 <sup>9</sup>   | Low risk (block randomization)             | Unclear                                                                                                                                                                                            | High risk (Open study, with outcome observer blinded only) | Low risk (13 out of 107 lost to follow up)                     | Low risk                     |
| Gillies 1984 <sup>10</sup>   | Unclear                                    | Unclear                                                                                                                                                                                            | High risk (open study)                                     | Low risk (4 out of 28 lost to follow up)                       | Low risk                     |
| Koolen 1984 <sup>11</sup>    | Unclear                                    | Unclear                                                                                                                                                                                            | High risk (Open study, with outcome observer blinded only) | Low risk (no loss to follow up)                                | Low risk                     |
| Koolen 1984 <sup>12</sup>    | Unclear                                    | Unclear                                                                                                                                                                                            | High risk (open study)                                     | Low risk (no loss to follow up)                                | Low risk                     |
| Maxwell 1984 <sup>13</sup>   | Unclear                                    | Unclear                                                                                                                                                                                            | High risk (open study)                                     | Low risk (no loss to follow up)                                | Low risk                     |
| Myers 1984 <sup>14</sup>     | Unclear                                    | Unclear                                                                                                                                                                                            | Unclear                                                    | Low risk (ITT analysis)                                        | Low risk                     |
| Richards 1984 <sup>15</sup>  | Unclear                                    | Unclear                                                                                                                                                                                            | High risk (open study with BP measured by minicomputer)    | High risk (4 out of 16 lost)                                   | Low risk                     |
| Skrabal 1984 <sup>16</sup>   | Unclear                                    | Unclear                                                                                                                                                                                            | High risk (open study)                                     | Unclear                                                        | Low risk                     |
| Resnick 1985 <sup>17</sup>   | Unclear                                    | Unclear                                                                                                                                                                                            | High risk (open study)                                     | Low risk (no loss to follow up)                                | Low risk                     |
| Skrabal 1985 <sup>18</sup>   | Unclear                                    | Unclear                                                                                                                                                                                            | High risk (open study with BP observer blinded only)       | Low risk (no loss to follow up)                                | Low risk                     |
| Ashry 1987 <sup>19</sup>     | Unclear                                    | Unclear                                                                                                                                                                                            | High risk (open study with BP observer blinded only)       | Low risk (no loss to follow up)                                | Low risk                     |
| Grobbee 1987 <sup>20</sup>   | Unclear                                    | Unclear                                                                                                                                                                                            | Low risk (double blinding)                                 | Low risk (no loss to follow up)                                | Low risk                     |
| MacGregor 1987 <sup>21</sup> | Unclear                                    | Unclear                                                                                                                                                                                            | Low risk (double blinding)                                 | Low risk (no loss to follow up)                                | Low risk                     |

| <b>Study</b>                  | <b>Sequence generation</b>     | <b>Allocation concealment</b> | <b>Blinding of participants, personnel and outcome assessors</b>                   | <b>Incomplete outcome data</b>                                                     | <b>Selective reporting</b> |
|-------------------------------|--------------------------------|-------------------------------|------------------------------------------------------------------------------------|------------------------------------------------------------------------------------|----------------------------|
| Morgan 1987 <sup>22</sup>     | Low risk (block randomization) | Unclear                       | High risk (open study with BP observer blinded only)                               | Low risk                                                                           | Low risk                   |
| Lawton 1988 <sup>23</sup>     | Unclear                        | Unclear                       | High risk (open study)                                                             | Low risk (no loss to follow up)                                                    | Low risk                   |
| Morgan 1988 <sup>24</sup>     | Low risk (latin square)        | Unclear                       | Low risk (double blinding)                                                         | Low risk (no loss to follow up)                                                    | Low risk                   |
| Morgan 1988 <sup>25</sup>     | Unclear                        | Unclear                       | Low risk (double blinding)                                                         | Unclear                                                                            | Unclear                    |
| Nowson 1988 <sup>26</sup>     | Unclear                        | Unclear                       | High risk (open study with BP observer blinded only)                               | Low risk (ITT analysis)                                                            | Low risk                   |
| Nowson 1988 <sup>26</sup>     | Unclear                        | Unclear                       | High risk (open study with BP observer blinded only)                               | Low risk (ITT analysis)                                                            | Low risk                   |
| Staessen 1988 <sup>27</sup>   | Unclear                        | Unclear                       | High risk (Neither patients nor observers were blinded)                            | Low risk (<0.2 loss to follow up)                                                  | High risk                  |
| Chalmers 1989 <sup>28</sup>   | Unclear                        | Unclear                       | Low risk (double blinding)                                                         | Low risk (ITT analysis)                                                            | Low risk                   |
| Chalmers 1989 <sup>29</sup>   | Unclear                        | Unclear                       | Low risk (double blinding)                                                         | Low risk                                                                           | Low risk                   |
| Dodson 1989 <sup>30</sup>     | Unclear                        | Unclear                       | Low risk (double blinding)                                                         | High risk (4 out of 13 lost to follow up)                                          | High risk                  |
| Hargreaves 1989 <sup>31</sup> | Unclear                        | Unclear                       | Low risk (double blinding)                                                         | Low risk (no loss to follow up)                                                    | Low risk                   |
| MacGregor 1989 <sup>32</sup>  | Unclear                        | Unclear                       | Low risk (double blinding)                                                         | Low risk (no loss to follow up)                                                    | Low risk                   |
| Bruun 1990 <sup>33</sup>      | Unclear                        | Unclear                       | High risk (open study)                                                             | Low risk (no loss to follow up)                                                    | Low risk                   |
| Parker 1990 <sup>34</sup>     | Unclear                        | Unclear                       | Low risk (double blinding)                                                         | Low risk (no loss to follow up)                                                    | Low risk                   |
| Río 1990 <sup>35</sup>        | Unclear                        | Unclear                       | Low risk (double blinding)                                                         | Low risk (no loss to follow up)                                                    | Low risk                   |
| Sharma 1990 <sup>36</sup>     | Unclear                        | Unclear                       | Low risk (participants blinded by placebo and BP was measured by automatic device) | Low risk (no loss to follow up)                                                    | Low risk                   |
| Sharma 1990 <sup>37</sup>     | Low risk (latin square design) | Unclear                       | High risk (open study with BP observer blinded only)                               | Low risk (5 out of total 45 was excluded from the analysis due to poor compliance) | High risk                  |
| Carney 1991 <sup>38</sup>     | Unclear                        | Unclear                       | Low risk (double blinding)                                                         | Low risk (no loss to follow up)                                                    | Low risk                   |
| Creager 1991 <sup>39</sup>    | Unclear                        | Unclear                       | Unclear                                                                            | Low risk (no loss to follow up)                                                    | Low risk                   |
| Sharma 1991 <sup>40</sup>     | Unclear                        | Unclear                       | High risk (open study with BP observer blinded only)                               | Low risk (2 out of 25 lost to follow up)                                           | Low risk                   |
| Singer 1991 <sup>41</sup>     | Unclear                        | Unclear                       | Low risk (double blinding)                                                         | Low risk (no loss to follow up)                                                    | Low risk                   |
| Alli 1992 <sup>42</sup>       | Unclear                        | Unclear                       | High risk (Neither patients nor observers were blinded)                            | High risk (21 out of 77 lost to follow up)                                         | High risk                  |

| <b>Study</b>                 | <b>Sequence generation</b>                             | <b>Allocation concealment</b>                                                                                                                                        | <b>Blinding of participants, personnel and outcome assessors</b>                       | <b>Incomplete outcome data</b>                                                                                                                                       | <b>Selective reporting</b> |
|------------------------------|--------------------------------------------------------|----------------------------------------------------------------------------------------------------------------------------------------------------------------------|----------------------------------------------------------------------------------------|----------------------------------------------------------------------------------------------------------------------------------------------------------------------|----------------------------|
| Arroll 1992 <sup>43</sup>    | Unclear                                                | Unclear                                                                                                                                                              | High risk (open study with BP observer blinded only)                                   | Low risk (27 out of 208 lost to follow up)                                                                                                                           | Low risk                   |
| Benetos 1992 <sup>44</sup>   | Low risk (computer randomization)                      | Unclear                                                                                                                                                              | Low risk (double blinding)                                                             | Low risk (2 out of 22 lost to follow up)                                                                                                                             | Low risk                   |
| Cobiac 1992 <sup>45</sup>    | Unclear                                                | Unclear                                                                                                                                                              | Low risk (double blinding)                                                             | Low risk (1 out of 107 randomized was excluded from the analysis because the patient took antihypertensive medication, which was an exclusion criteria of the study) | Low risk                   |
| Gow 1992 <sup>46</sup>       | Unclear                                                | Unclear                                                                                                                                                              | High risk (open study)                                                                 | Low risk (no loss to follow up)                                                                                                                                      | Low risk                   |
| Huggins 1992 <sup>47</sup>   | Unclear                                                | Unclear                                                                                                                                                              | Low risk (double blinding)                                                             | Low risk (no loss to follow up)                                                                                                                                      | Low risk                   |
| Cutler 1992 <sup>48</sup>    | Low risk                                               | Low risk (Randomization assignments were received from the coordinating center by telephone or sealed opaque envelopes were used to convey the treatment assignment) | High risk (open study with BP observer blinded only)                                   | Low risk (ITT analysis)                                                                                                                                              | Low risk                   |
| Fotherby 1993 <sup>49</sup>  | Unclear                                                | Unclear                                                                                                                                                              | Low risk (double blinding)                                                             | Low risk (1 out of 18 lost to follow up)                                                                                                                             | Low risk                   |
| Nestel 1993 <sup>50</sup>    | Unclear                                                | Unclear                                                                                                                                                              | Low risk (double blinding)                                                             | Low risk (no loss to follow up)                                                                                                                                      | Low risk                   |
| Redon-Mas 1993 <sup>51</sup> | Unclear                                                | Unclear                                                                                                                                                              | High risk (open study)                                                                 | High risk (156 out of 574 not included in the analysis because sodium excretion did not meet requirements of the study)                                              | Low risk                   |
| Río 1993 <sup>52</sup>       | Unclear                                                | Unclear                                                                                                                                                              | Low risk (double blinding)                                                             | High risk (17 out of 47 lost to follow up)                                                                                                                           | Low risk                   |
| Ruilope 1993 <sup>53</sup>   | Unclear                                                | Unclear                                                                                                                                                              | Low risk (double blinding)                                                             | Low risk (no loss to follow up)                                                                                                                                      | Low risk                   |
| Ruppert 1993 <sup>54</sup>   | Unclear                                                | Unclear                                                                                                                                                              | Low risk (patients blinded by placebo and blood pressure measured by automated device) | Low risk (no loss to follow up)                                                                                                                                      | Low risk                   |
| Sharma 1993 <sup>55</sup>    | Unclear                                                | Unclear                                                                                                                                                              | High risk (open study with BP observer blinded only)                                   | Low risk (no loss to follow up)                                                                                                                                      | Low risk                   |
| Sharma 1993 <sup>56</sup>    | Low risk (randomized according to Latin square design) | Unclear                                                                                                                                                              | High risk (open study)                                                                 | High risk (5 out of 20 lost)                                                                                                                                         | Low risk                   |
| Sharma 1993 <sup>57</sup>    | Unclear                                                | Unclear                                                                                                                                                              | High risk (open study with BP observer blinded only)                                   | Low risk (no loss to follow up)                                                                                                                                      | Low risk                   |
| Zoccali 1993 <sup>58</sup>   | Unclear                                                | Unclear                                                                                                                                                              | High risk (open study with BP observer blinded only)                                   | Low risk (no loss to follow up)                                                                                                                                      | Low risk                   |

| <b>Study</b>                 | <b>Sequence generation</b>                                                                                               | <b>Allocation concealment</b>                                                                                                                                                                                              | <b>Blinding of participants, personnel and outcome assessors</b> | <b>Incomplete outcome data</b>             | <b>Selective reporting</b> |
|------------------------------|--------------------------------------------------------------------------------------------------------------------------|----------------------------------------------------------------------------------------------------------------------------------------------------------------------------------------------------------------------------|------------------------------------------------------------------|--------------------------------------------|----------------------------|
| Howe 1994 <sup>59</sup>      | Unclear                                                                                                                  | Unclear                                                                                                                                                                                                                    | Low risk (double blinding)                                       | Low risk (5 out of 61 lost to follow up)   | Low risk                   |
| Iwaoka 1994 <sup>60</sup>    | Unclear                                                                                                                  | Unclear                                                                                                                                                                                                                    | High risk (open study)                                           | Low risk (no loss to follow up)            | Low risk                   |
| MacFadyen 1994 <sup>61</sup> | Unclear                                                                                                                  | Low risk (Treatments were administered in a randomised, double-blind, crossover design according to a pre-prepared schedule administered independently of the investigators by the Department of Pharmacy of the hospital) | Low risk (double blinding)                                       | Low risk (no loss to follow up)            | Low risk                   |
| Zoccali 1994 <sup>62</sup>   | Unclear                                                                                                                  | Unclear                                                                                                                                                                                                                    | High risk (open study with BP observer blinded only)             | Low risk (no loss to follow up)            | Low risk                   |
| Doig 1995 <sup>63</sup>      | Unclear                                                                                                                  | Low risk (randomization code prepared separately of the investigator)                                                                                                                                                      | Low risk (double blinding)                                       | Low risk (no loss to follow up)            | Low risk                   |
| Draaijer 1995 <sup>64</sup>  | Unclear                                                                                                                  | Unclear                                                                                                                                                                                                                    | High risk (open study with BP observer blinded only)             | Low risk (no loss to follow up)            | Low risk                   |
| Stein 1995 <sup>65</sup>     | Unclear                                                                                                                  | Unclear                                                                                                                                                                                                                    | High risk (open study)                                           | Low risk (no loss to follow up)            | Low risk                   |
| Weir 1995 <sup>66</sup>      | Unclear                                                                                                                  | Unclear                                                                                                                                                                                                                    | High risk (Patients blinded only, by using placebo)              | Low risk (no loss to follow up)            | Low risk                   |
| Bellini 1996 <sup>67</sup>   | Unclear                                                                                                                  | Unclear                                                                                                                                                                                                                    | Low risk (double blinding)                                       | High risk (12 out of 55 lost to follow up) | High risk                  |
| Ferri 1996 <sup>68</sup>     | Unclear                                                                                                                  | Unclear                                                                                                                                                                                                                    | Low risk (double blinding)                                       | Low risk (4 out of 65 lost to follow up)   | Low risk                   |
| Grey 1996 <sup>69</sup>      | Unclear                                                                                                                  | Unclear                                                                                                                                                                                                                    | Low risk (double blinding)                                       | Low risk (no loss to follow up)            | Low risk                   |
| Inoue 1996 <sup>70</sup>     | Unclear                                                                                                                  | Unclear                                                                                                                                                                                                                    | Low risk (double blinding)                                       | Low risk (no loss to follow up)            | Low risk                   |
| Ishimitsu 1996 <sup>71</sup> | Unclear                                                                                                                  | Unclear                                                                                                                                                                                                                    | High risk (open study)                                           | Low risk (no loss to follow up)            | Low risk                   |
| Schorr 1996 <sup>72</sup>    | Unclear                                                                                                                  | Unclear                                                                                                                                                                                                                    | Low risk (double blinding)                                       | High risk (5 out of 16 lost to follow up)  | Low risk                   |
| Zoccali 1996 <sup>73</sup>   | Unclear                                                                                                                  | High risk (study staff were aware of the allocation)                                                                                                                                                                       | High risk (open study)                                           | High risk (4 out of 18 lost to follow up)  | Low risk                   |
| Cappuccio 1997 <sup>74</sup> | Low risk (random-generated numbers handled by one not involved in the clinical assessments) in the clinical assessments) | Low risk (neither nurses nor participants were aware of the treatment allocation)                                                                                                                                          | Low risk (double blinding)                                       | Low risk (1 out of 48 lost to follow up)   | Low risk                   |
| Cutler 1997 <sup>75</sup>    | Unclear                                                                                                                  | Low risk (Randomization was performed by telephone contact with the TOHP coordinating center or by opening a sealed opaque envelope)                                                                                       | High risk (open study with BP observer blinded only)             | Unclear                                    | Low risk                   |

| <b>Study</b>                        | <b>Sequence generation</b>        | <b>Allocation concealment</b>                                                                                                   | <b>Blinding of participants, personnel and outcome assessors</b>                                                                                                         | <b>Incomplete outcome data</b>                                                              | <b>Selective reporting</b>                                     |
|-------------------------------------|-----------------------------------|---------------------------------------------------------------------------------------------------------------------------------|--------------------------------------------------------------------------------------------------------------------------------------------------------------------------|---------------------------------------------------------------------------------------------|----------------------------------------------------------------|
| McCarron 1997 <sup>76</sup>         | Low risk (computer randomization) | Low risk (Placebo-controlled and study personnel blinded to the subjects' NaCl intake)                                          | Low risk (double blinding)                                                                                                                                               | Low risk (no loss to follow up)                                                             | Low risk                                                       |
| Meland 1997 <sup>77</sup>           | Unclear                           | Unclear                                                                                                                         | Low risk (double blinding)                                                                                                                                               | Low risk (no loss to follow up)                                                             | Low risk                                                       |
| Schorr 1997 <sup>78</sup>           | Unclear                           | Unclear                                                                                                                         | High risk (Patients blinded only by using placebo)                                                                                                                       | Low risk (no loss to follow up)                                                             | Low risk                                                       |
| Yamamoto 1997 <sup>79</sup>         | Unclear                           | Unclear                                                                                                                         | Unclear                                                                                                                                                                  | Low risk                                                                                    | High risk                                                      |
| Foo 1998 <sup>80</sup>              | Unclear                           | Unclear                                                                                                                         | Low risk (double blinding)                                                                                                                                               | Low risk (no loss to follow up)                                                             | Low risk                                                       |
| Gomi 1998 <sup>81</sup>             | Unclear                           | Unclear                                                                                                                         | High risk (open study with BP observer blinded only)                                                                                                                     | Low risk (no loss to follow up)                                                             | Low risk                                                       |
| Herlitz 1998 <sup>82</sup>          | Unclear                           | Unclear                                                                                                                         | Low risk (double blinding)                                                                                                                                               | Low risk (no loss to follow up)                                                             | Low risk                                                       |
| Wing 1998 <sup>83</sup>             | Low risk (latin square)           | Unclear                                                                                                                         | Low risk (double blinding)                                                                                                                                               | Low risk (2 out 19 lost)                                                                    | Low risk                                                       |
| Davrath 1999 <sup>84</sup>          | Unclear                           | Unclear                                                                                                                         | High risk (open study with BP observer blinded only)                                                                                                                     | Low risk (no loss to follow up)                                                             | Low risk                                                       |
| Schorr 1999 <sup>85</sup>           | Unclear                           | Unclear                                                                                                                         | High risk (Open study, with outcome observer blinded only)                                                                                                               | Low risk (no loss to follow up)                                                             | Low risk                                                       |
| Uzu 1999 <sup>86</sup>              | Unclear                           | Unclear                                                                                                                         | High risk (open study with BP observer blinded only)                                                                                                                     | Low risk (no loss to follow up)                                                             | Low risk                                                       |
| Boero 2000 <sup>87</sup>            | Unclear                           | Unclear                                                                                                                         | High risk (Intervention conducted by physicians and both the physicians and participants were aware of the allocation. Unclear if outcome observers were blinded or not) | Low risk (15 randomized, 1 withdrew consent, 1 didn't comply the protocol and 13 analyzed.) | Low risk                                                       |
| Ames 2001 <sup>88</sup>             | Unclear                           | Unclear                                                                                                                         | High risk (Patients blinded only, by using placebo)                                                                                                                      | High risk (13 out of 30 lost to follow up)                                                  | Low risk                                                       |
| Appel 2001 <sup>89</sup>            | Unclear                           | Unclear                                                                                                                         | High risk (open study with BP observer blinded only)                                                                                                                     | Low risk (ITT analysis)                                                                     | Low risk                                                       |
| Johnson 2001 <sup>90</sup>          | Low risk (latin square)           | Unclear                                                                                                                         | Low risk (double blinding)                                                                                                                                               | Low risk (6 out of 46 lost)                                                                 | Low risk                                                       |
| Akita 2003 <sup>91</sup>            | Unclear                           | Unclear                                                                                                                         | High risk (open study with BP observer blinded only)                                                                                                                     | Low risk (9% loss to follow up)                                                             | Low risk                                                       |
| Dishy 2003 <sup>92</sup>            | Unclear                           | Unclear                                                                                                                         | High risk (open study)                                                                                                                                                   | Low risk (no loss to follow up)                                                             | Low risk                                                       |
| Nowson 2003 <sup>93</sup>           | Low risk (random number in excel) | Low risk (Placebo-controlled and research personnel were unaware of the randomization status of subjects and tablet allocation) | Low risk (double blinding)                                                                                                                                               | High risk (20 out of 128 lost to follow up and 16 hypertensive not reported)                | High risk (results for hypertensive participants not reported) |
| Pechere-Bertschi 2003 <sup>94</sup> | Unclear                           | Unclear                                                                                                                         | High risk (open study with BP observer blinded only)                                                                                                                     | Low risk (no loss to follow up)                                                             | Unclear                                                        |

| <b>Study</b>                    | <b>Sequence generation</b>                                                                                                                     | <b>Allocation concealment</b>                                                                                                                  | <b>Blinding of participants, personnel and outcome assessors</b>                                                                                                                     | <b>Incomplete outcome data</b>             | <b>Selective reporting</b> |
|---------------------------------|------------------------------------------------------------------------------------------------------------------------------------------------|------------------------------------------------------------------------------------------------------------------------------------------------|--------------------------------------------------------------------------------------------------------------------------------------------------------------------------------------|--------------------------------------------|----------------------------|
| Perry 2003 <sup>95</sup>        | Unclear                                                                                                                                        | Unclear                                                                                                                                        | Low risk (double blinding)                                                                                                                                                           | Low risk (no loss to follow up)            | Low risk                   |
| Beeks 2004 <sup>96</sup>        | Unclear                                                                                                                                        | Unclear                                                                                                                                        | High risk (open study)                                                                                                                                                               | Low risk (no loss to follow up)            | Low risk                   |
| Berge-Landry 2004 <sup>97</sup> | Unclear                                                                                                                                        | Unclear                                                                                                                                        | High risk (open study)                                                                                                                                                               | Low risk (no loss to follow up)            | Low risk                   |
| Gates 2004 <sup>98</sup>        | Unclear                                                                                                                                        | Unclear                                                                                                                                        | Low risk (double blinding)                                                                                                                                                           | Low risk (no loss to follow up)            | Low risk                   |
| Forrester 2005 <sup>99</sup>    | Low risk (block randomization)                                                                                                                 | Unclear                                                                                                                                        | High risk (open study)                                                                                                                                                               | Low risk (No loss to follow up)            | Low risk                   |
| Forrester 2005 <sup>99</sup>    | Low risk (block randomization)                                                                                                                 | Unclear                                                                                                                                        | Unclear                                                                                                                                                                              | Low risk (No loss to follow up)            | Low risk                   |
| Swift 2005 <sup>100</sup>       | Unclear                                                                                                                                        | Unclear                                                                                                                                        | Low risk (double blinding)                                                                                                                                                           | Low risk (6 out of 46 lost to follow up)   | Low risk                   |
| Cappuccio 2006 <sup>101</sup>   | Low risk (Villages were randomised in blocks of two, and stratified for locality (semi-urban or rural) by an independent statistician)         | Low risk                                                                                                                                       | High risk (Community health workers conducted the intervention and was not possible to be blinded. Only participants were blinded. Unclear if outcome assessors were blinded or not) | Low risk (ITT analysis)                    | Low risk                   |
| Ho 2007 <sup>102</sup>          | Unclear                                                                                                                                        | Unclear                                                                                                                                        | High risk (open study with BP observer blinded only)                                                                                                                                 | High risk (19 out of 44 lost to follow up) | Low risk                   |
| Melander 2007 <sup>103</sup>    | Unclear                                                                                                                                        | Unclear                                                                                                                                        | Low risk (double blinding)                                                                                                                                                           | Low risk (7 out of 46 lost to follow up)   | Low risk                   |
| Townsend 2007 <sup>104</sup>    | Low risk (using a pre-specified randomized blocked (block=ten subjects) table generated by the GCRC biostatistician and kept by the dietician) | Low risk (using a pre-specified randomized blocked (block=ten subjects) table generated by the GCRC biostatistician and kept by the dietician) | Low risk (double blinding)                                                                                                                                                           | Low risk (no loss to follow up)            | Low risk                   |
| Jessani 2008 <sup>105</sup>     | Low risk (computer randomization)                                                                                                              | Low risk                                                                                                                                       | High risk (open study with BP observer blinded only)                                                                                                                                 | Low risk (16 out of 200 lost to follow up) | Low risk                   |
| Tzemos 2008 <sup>106</sup>      | Unclear                                                                                                                                        | Unclear                                                                                                                                        | Low risk (double blinding)                                                                                                                                                           | Low risk (no loss to follow up)            | Low risk                   |
| Visser 2008 <sup>107</sup>      | Unclear                                                                                                                                        | Unclear                                                                                                                                        | Low risk (double blinding)                                                                                                                                                           | Low risk (no loss to follow up)            | Unclear                    |
| Dickinson 2009 <sup>108</sup>   | Low risk (computer randomization)                                                                                                              | Unclear                                                                                                                                        | High risk (open study with BP observer blinded only)                                                                                                                                 | Low risk (2 out of 31 lost to follow up)   | Low risk                   |
| He 2009 <sup>109</sup>          | Low risk (computer randomization)                                                                                                              | Low risk                                                                                                                                       | Low risk (double blinding)                                                                                                                                                           | Low risk (16 out of 185 lost to follow up) | Low risk                   |
| Meland 2009 <sup>110</sup>      | Unclear (simple randomization to ensure equal number in both groups, but didn't                                                                | Low risk (The randomization list was concealed and kept inaccessible to the investigators during the trial, and was                            | Low risk (double blinding)                                                                                                                                                           | Low risk (4 out of 50 lost to follow up)   | Low risk                   |

| Study                             | Sequence generation                                                                                       | Allocation concealment                                                                                                                                                               | Blinding of participants, personnel and outcome assessors                                           | Incomplete outcome data                                                     | Selective reporting |
|-----------------------------------|-----------------------------------------------------------------------------------------------------------|--------------------------------------------------------------------------------------------------------------------------------------------------------------------------------------|-----------------------------------------------------------------------------------------------------|-----------------------------------------------------------------------------|---------------------|
|                                   | mention how it was done)                                                                                  | disclosed after all the statistical analyses had been conducted)                                                                                                                     |                                                                                                     |                                                                             |                     |
| Paulsen 2009 <sup>111</sup>       | Unclear                                                                                                   | Low risk (randomization and blinding of sodium chloride tablets was conducted by the hospital pharmacy)                                                                              | Low risk (double blinding)                                                                          | Low risk (5 out of 27 lost to follow up)                                    | Low risk            |
| Pimenta 2009 <sup>112</sup>       | Unclear                                                                                                   | Unclear                                                                                                                                                                              | High risk (open study)                                                                              | Low risk (1 out of 13 lost to follow up)                                    | Low risk            |
| Weir 2010 <sup>113</sup>          | Unclear                                                                                                   | Unclear                                                                                                                                                                              | High risk (open study with BP observer blinded only)                                                | Low risk (17 out of 132 lost to follow up)                                  | Low risk            |
| Zanchi 2010 <sup>114</sup>        | Unclear                                                                                                   | Unclear                                                                                                                                                                              | Low risk (double blinding)                                                                          | Low risk (1 out of 10 lost to follow up)                                    | Low risk            |
| Starmans-Kool 2011 <sup>115</sup> | Low risk (computer randomization)                                                                         | Low risk (A copy of the list was given to the hospital kitchen, and the original was kept in a sealed envelope at the department. The code was revealed when the study was finished) | Low risk (double blinding)                                                                          | Low risk (4 out of 25 lost to follow up)                                    | Low risk            |
| Carey 2012 <sup>116</sup>         | Unclear                                                                                                   | Unclear                                                                                                                                                                              | Low risk (double blinding)                                                                          | Low risk (no loss to follow up)                                             | Low risk            |
| Carey 2012 <sup>116</sup>         | Unclear                                                                                                   | Unclear                                                                                                                                                                              | High risk (open study)                                                                              | Unclear                                                                     | Low risk            |
| Graffe 2012 <sup>117</sup>        | Unclear                                                                                                   | Unclear                                                                                                                                                                              | High risk (open study)                                                                              | Unclear                                                                     | Low risk            |
| Bonfils 2013 <sup>118</sup>       | Low risk (tossing coin)                                                                                   | High risk (The primary investigator assigned participants to the interventions according to the randomization sequence. The patients were not blinded for treatment assignment)      | High risk (open study with BP observer blinded only)                                                | Low risk (ITT analysis)                                                     | Low risk            |
| Mallamaci 2013 <sup>119</sup>     | Unclear                                                                                                   | Unclear                                                                                                                                                                              | Low risk (intervention was placebo controlled and 24-hour ambulatory BP was measured with a device) | Low risk (no loss to follow up)                                             | Low risk            |
| Allen 2014 <sup>120</sup>         | Unclear                                                                                                   | Unclear                                                                                                                                                                              | High risk (open study with BP observer blinded only)                                                | Unclear (No. randomized not reported and no loss to follow up was reported) | Unclear             |
| Cavka 2015 <sup>121</sup>         | Unclear                                                                                                   | Unclear                                                                                                                                                                              | High risk (Patients blinded only, by using placebo)                                                 | Low risk (no loss to follow up)                                             | Low risk            |
| Gijsbers 2015 <sup>122</sup>      | Low risk (computer-generated table)                                                                       | Low risk (independent person)                                                                                                                                                        | Low risk (double blinding)                                                                          | Low risk (1 out of 37 lost to follow up)                                    | Low risk            |
| He 2015 <sup>123</sup>            | Low risk (random number list generated by a researcher who was blind to the identity of the participants) | Low risk                                                                                                                                                                             | High risk (open study with BP observer blinded only)                                                | Low risk (ITT analysis)                                                     | Low risk            |

| <b>Study</b>                  | <b>Sequence generation</b>        | <b>Allocation concealment</b>  | <b>Blinding of participants, personnel and outcome assessors</b> | <b>Incomplete outcome data</b>              | <b>Selective reporting</b>                         |
|-------------------------------|-----------------------------------|--------------------------------|------------------------------------------------------------------|---------------------------------------------|----------------------------------------------------|
| Markota 2015 <sup>124</sup>   | Unclear                           | Low risk (sealed envelope)     | High risk (open study)                                           | Low risk (no loss to follow up)             | Low risk                                           |
| Matthews 2015 <sup>125</sup>  | Unclear                           | Unclear                        | Unclear                                                          | Low risk (no loss to follow up)             | High risk (results only reported for 20 out of 41) |
| Riphagen 2016 <sup>126</sup>  | Unclear                           | Unclear                        | Low risk (double blinding)                                       | Low risk (1 out of 36 lost to follow up)    | Low risk                                           |
| Suckling 2016 <sup>127</sup>  | Low risk (computer randomization) | Low risk (independent company) | Low risk (double blinding)                                       | Low risk (3 out of 49 lost to follow up)    | Low risk                                           |
| Brian 2017 <sup>128</sup>     | Unclear                           | Unclear                        | High risk (open study with patients not blinded to assignment)   | High risk (21 out of 101 lost to follow up) | High risk                                          |
| Gefke 2017 <sup>129</sup>     | Unclear                           | Unclear                        | High risk (open study)                                           | Low risk                                    | Low risk                                           |
| Babcock 2018 <sup>130</sup>   | Unclear                           | Unclear                        | High risk (open study with BP observer blinded only)             | Low risk                                    | Low risk                                           |
| Parvanova 2018 <sup>131</sup> | Low risk                          | Low risk                       | High risk (open study with BP observer blinded only)             | Low risk                                    | Low risk                                           |
| Rorijs 2018 <sup>132</sup>    | Low risk (block randomization)    | Unclear                        | High risk (open study)                                           | Low risk                                    | Low risk                                           |
| Wang 2018 <sup>133</sup>      | Unclear                           | Unclear                        | High risk (open study with BP observer blinded only)             | Low risk                                    | Low risk                                           |

## References

1. Parijs J, Joossens J, Linden L, et al. Moderate sodium restriction and diuretics in the treatment of hypertension. *Am Heart J*. 1973;85(1):22-34.
2. Mark A, Lawton W, Abboud F, et al. Effects of high and low sodium intake on arterial pressure and forearm vascular resistance in borderline hypertension. A preliminary report. *Circulation Research*. 1975;36(6 Suppl 1):194-8.
3. Morgan T, Myers J. Hypertension treated by sodium restriction. *Medical journal of Australia*. 1981;2(8):396-7.
4. Skrabal F, Auböck J, Hörtnagl H. Low sodium/high potassium diet for prevention of hypertension: probable mechanisms of action. *Lancet*. 1981;2(8252):895-900.
5. MacGregor G, Markandu N, Best F, et al. Double-blind randomised crossover trial of moderate sodium restriction in essential hypertension. *Lancet*. 1982;1(8268):351-5.
6. Puska P, Iacono J, Nissinen A, et al. Controlled, randomised trial of the effect of dietary fat on blood pressure. *Lancet*. 1983;1(8314-5):1-5.
7. Silman AJ, Mitchell P, Locke C, et al. Evaluation of the effectiveness of a low sodium diet in the treatment of mild to moderate hypertension. *Lancet*. 1983;1(8335):1179-82.
8. Watt GCM, Edwards C, Hart JT. Dietary sodium restriction for mild hypertension in general practice. *BMJ*. 1983;286(6363):432-6.
9. Erwtaman TM, Nagelkerke N, Lubsen J, et al. beta Blockade, diuretics, and salt restriction for the management of mild hypertension: A randomised double blind trial. *BMJ*. 1984;289(6442):406-9.
10. Gillies A, Carney S, Smith A, et al. Adjunctive effect of salt restriction on antihypertensive efficacy. *Clin Exp Pharmacol Physiol*. 1984;11(4):395-8.
11. Koolen M, Brummelen P. Adrenergic activity and peripheral hemodynamics in relation to sodium sensitivity in patients with essential hypertension. *Hypertension*. 1984;6(6 Pt 1):820-5.
12. Koolen M, Brummelen P. Sodium sensitivity in essential hypertension: role of the renin-angiotensin-aldosterone system and predictive value of an intravenous frusemide test. *J Hypertens*. 1984;2(1):55-9.
13. Maxwell M, Kushiro T, Dornfeld L, et al. BP changes in obese hypertensive subjects during rapid weight loss. Comparison of restricted v unchanged salt intake. *Arch Intern Med*. 1984;144(8):1581-4.
14. Myers J, Morgan T. Effect of alteration in sodium chloride intake on blood pressure of normotensive subjects. *J Cardiovasc Pharmacol*. 1984;6 Suppl 1:S204-9.
15. Richards A, Espiner E, Maslowski A, et al. Blood pressure response to moderate sodium restriction and to potassium supplementation in mild essential hypertension. *Lancet*. 1984;1(8380):757-61.
16. Skrabal F, Herholz H, Neumayr M, et al. Salt sensitivity in humans is linked to enhanced sympathetic responsiveness and to enhanced proximal tubular reabsorption. *Hypertension*. 1984;6(2 Pt 1):152-8.
17. Resnick L, Nicholson J, Laragh J. Alterations in calcium metabolism mediate dietary salt sensitivity in essential hypertension. *Trans Assoc Am Physicians*. 1985;98:313-21.
18. Skrabal F, Hamberger L, Cerny E. Salt sensitivity in normotensives with and salt resistance in normotensives without heredity of hypertension. *Scand J Clin Lab Invest*. 1985;45(Suppl. 176):47-57.
19. Ashry A, Heagerty A, Alton S, et al. Effects of manipulation of sodium balance on erythrocyte sodium transport. *J Hum Hypertens*. 1987;1(2):105-11.
20. Grobbee D, Hofman A, Roelandt J, et al. Sodium restriction and potassium supplementation in young people with mildly elevated blood pressure. *J Hypertens*. 1987;5(1):115-9.
21. MacGregor GA, Markandu ND, Singer DRJ. Moderate sodium restriction with angiotensin converting enzyme inhibitor in essential hypertension: A double blind study. *BMJ*. 1987;294(6571):531-4.
22. Morgan T, Anderson A. Sodium restriction can delay the return of hypertension in patients previously well-controlled on drug therapy. *Can J Physiol Pharmacol*. 1987;65(8):1752-5.
23. Lawton W, Sinkey C, Fitz A, et al. Dietary salt produces abnormal renal vasoconstrictor responses to upright posture in borderline hypertensive subjects. *Hypertension*. 1988;11(6 Pt 1):529-36.
24. Morgan T, Anderson A. Interaction in hypertensive man between sodium intake, converting enzyme inhibitor (enalapril), plasma renin and blood pressure control. *J Hum Hypertens*. 1988;1(4):311-5.
25. Morgan T, Anderson A. Interaction of slow-channel calcium blocking drugs with sodium restriction, diuretics and angiotensin converting enzyme inhibitors. *J Hypertens*. 1988;6 (suppl 4):S652-4.
26. Nowson CA, Morgan TO. Change in blood pressure in relation to change in nutrients effected by manipulation of dietary sodium and potassium. *Clin Exp Pharmacol Physiol*. 1988;15(3):225-42.

27. Staessen J, Bulpitt C, Fagard R, et al. Salt intake and blood pressure in the general population: a controlled intervention trial in two towns. *J Hypertens*. 1988;6(12):965-73.
28. Chalmers JP, Doyle AE, Hopper JL, et al. Effects of replacing sodium intake in subjects on a low sodium diet: A crossover study. *Clin Exp Hypertens A*. 1989;11(5-6):1011-24.
29. Chalmers JP, Doyle AE, Hopper JL, et al. Fall in blood pressure with modest reduction in dietary salt intake in mild hypertension. *Lancet*. 1989;1(8635):399-402.
30. Dodson PM, Beevers M, Hallworth R, et al. Sodium restriction and blood pressure in hypertensive type II diabetics: Randomised blind controlled and crossover studies of moderate sodium restriction and sodium supplementation. *BMJ*. 1989;298(6668):227-30.
31. Hargreaves M, Morgan T, Snow R, et al. Exercise tolerance in the heat on low and normal salt intakes. *Clin Sci*. 1989;76(5):553-7.
32. MacGregor GA, Markandu ND, Sagnella GA, et al. Double-blind study of three sodium intakes and long-term effects of sodium restriction in essential hypertension. *Lancet*. 1989;2(8674):1244-7.
33. Bruun N, Skøtt P, Nielsen M, et al. Normal renal tubular response to changes of sodium intake in hypertensive man. *J Hypertens*. 1990;8:219-27.
34. Parker M, Puddey IB, Beilin LJ, et al. Two-way factorial study of alcohol and salt restriction in treated hypertensive men. *Hypertension*. 1990;16(4):398-406.
35. Río A, Rodríguez-Villamil J, López-Campos J, et al. Effect of moderate salt restriction on the antihypertensive action of nifedipine: a double blind study. *Rev Clin Esp*. 1990;186(1):5-10.
36. Sharma AM, Arntz HR, Kribben A, et al. Dietary sodium restriction: Adverse effect on plasma lipids. *Klinische Wochenschrift*. 1990;68(13):664-8.
37. Sharma AM, Kribben A, Schattenfroh S, et al. Salt sensitivity in humans is associated with abnormal acid-base regulation. *Hypertension*. 1990;16(4):407-13.
38. Carney S, Gillies A, Smith A, et al. Increased dietary sodium chloride in patients treated with antihypertensive drugs. *Clin Exp Hypertens A*. 1991;13(3):401-7.
39. Creager M, Roddy M, Holland K, et al. Sodium depresses arterial baroreceptor reflex function in normotensive humans. *Hypertension*. 1991;17(6 Pt 2):989-96.
40. Sharma A, Ruland K, Spies K, et al. Salt sensitivity in young normotensive subjects is associated with a hyperinsulinemic response to oral glucose. *J Hypertens*. 1991;9(4):329-35.
41. Singer DRJ, Markandu ND, Sugden AL, et al. Sodium restriction in hypertensive patients treated with a converting enzyme inhibitor and a thiazide. *Hypertension*. 1991;17(6 I):798-803.
42. Alli C, Avanzini F, Bettelli G, et al. Feasibility of a long-term low-sodium diet in mild hypertension. *J Hum Hypertens*. 1992;6(4):281-6.
43. Arroll B. The Auckland blood pressure control study: a randomised controlled trial of physical activity and salt restriction in persons. *Medical and health sciences*. 1992;PhD.
44. Benetos A, Yang-Yan X, Cuhe JL, et al. Arterial effects of salt restriction in hypertensive patients. A 9-week, randomized, double-blind, crossover study. *J Hypertens*. 1992;10(4):355-60.
45. Cobiac L, Nestel PJ, Wing LMH, et al. A low-sodium diet supplemented with fish oil lowers blood pressure in the elderly. *J Hypertens*. 1992;10(1):87-92.
46. Gow I, Dockrell M, Edwards C, et al. The sensitivity of human blood platelets to the aggregating agent ADP during different dietary sodium intakes in healthy men. *Eur J Clin Pharmacol*. 1992;43(6):635-8.
47. Huggins R, Nicolantonio R, Morgan T. Preferred salt levels and salt taste acuity in human subjects after ingestion of untasted salt. *Appetite*. 1992;18(2):111-9.
48. Cutler JA, Whelton PK, Appel L, et al. The effects of nonpharmacologic interventions on blood pressure of persons with high normal levels: Results of the trials of hypertension prevention, phase I. *JAMA*. 1992;267(9):1213-20.
49. Fotherby MD, Potter JF. Effects of moderate sodium restriction on clinic and twenty-four-hour ambulatory blood pressure in elderly hypertensive subjects. *J Hypertens*. 1993;11(6):657-63.
50. Nestel PJ, Clifton PM, Noakes M, et al. Enhanced blood pressure response to dietary salt in elderly women, especially those with small waist: Hip ratio. *J Hypertens*. 1993;11(12):1387-94.
51. Redon-Mas J, Abellan-Aleman J, Aranda-Lara P, et al. Antihypertensive activity of verapamil: Impact of dietary sodium. *J Hypertens*. 1993;11(6):665-71.
52. Río A, Rodríguez-Villamil J. Metabolic effects of strict salt restriction in essential hypertensive patients. *J Intern Med*. 1993;233(5):409-14.

53. Ruilope LM, Lahera V. Influence of salt intake on the antihypertensive effect of carvedilol. *J Hypertens.* 1993;11(SUPPL. 4):S17-S9.
54. Ruppert M, Overlack A, Kolloch R, et al. Neurohormonal and metabolic effects of severe and moderate salt restriction in non-obese normotensive adults. *J Hypertens.* 1993;11(7):743-9.
55. Sharma AM, Schorr U, Thiede HM, et al. Effect of dietary salt restriction on urinary serotonin and 5-hydroxyindoleacetic acid excretion in man. *J Hypertens.* 1993;11(12):1381-6.
56. Sharma A, Schorr U, Oelkers W, et al. Effects of sodium salts on plasma renin activity and norepinephrine response to orthostasis in salt-sensitive normotensive subjects. *Am J Hypertens.* 1993;6(9):780-5.
57. Sharma AM, Schorr U, Distler A. Insulin resistance in young salt-sensitive normotensive subjects. *Hypertension.* 1993;21(3):273-9.
58. Zoccali C, Mallamaci F, Leonardis D, et al. Randomly allocated crossover study of various levels of sodium intake in patients with mild hypertension. *J Hypertens.* 1993;11(suppl 5):S326-7.
59. Howe PRC, Lungershausen YK, Cobiac L, et al. Effect of sodium restriction and fish oil supplementation on BP and thrombotic risk factors in patients treated with ACE inhibitors. *J Hum Hypertens.* 1994;8(1):43-9.
60. Iwaoka T, Umeda T, Inoue J, et al. Dietary NaCl restriction deteriorates oral glucose tolerance in hypertensive patients with impairment of glucose tolerance. *Am J Hypertens.* 1994;7(5):460-3.
61. MacFadyen RJ, Lees KR, Reid JL. Responses to low dose intravenous perindoprilat infusion in salt deplete/salt replete normotensive volunteers. *Br J clin Pharmacol.* 1994;38(4):329-34.
62. Zoccali C, Mallamaci F, Parlongo S. The influence of salt intake on plasma calcitonin gene-related peptide in subjects with mild essential hypertension. *J Hypertens.* 1994;12(11):1249-53.
63. Doig J, MacFadyen R, Sweet C, et al. Haemodynamic and renal responses to oral losartan potassium during salt depletion or salt repletion in normal human volunteers. *J Cardiovasc Pharmacol.* 1995;25(4):511-7.
64. Draaijer P, De Leeuw P, Maessen J, et al. Salt-sensitivity testing in patients with borderline hypertension: Reproducibility and potential mechanisms. *J Hum Hypertens.* 1995;9(4):263-9.
65. Stein CM, Nelson R, Brown M, et al. Dietary sodium intake modulates systemic but not forearm norepinephrine release. *Clin Pharmacol Ther.* 1995;58(4):425-33.
66. Weir MR, Dengel DR, Behrens MT, et al. Salt-induced increases in systolic blood pressure affect renal hemodynamics and proteinuria. *Hypertension.* 1995;25(6):1339-44.
67. Bellini C, Ferri C, Carlomagno A, et al. Impaired inactive to active kallikrein conversion in human salt-sensitive hypertension. *J Am Soc Nephrol.* 1996;7(12):2565-77.
68. Ferri C, Bellini C, Carlomagno A, et al. Active kallikrein responds to changes in sodium-chloride intake in essential hypertensive patients. *J Am Soc Nephrol.* 1996;7(3):443-53.
69. Grey A, Braatvedt G, Holdaway I. Moderate dietary salt restriction does not alter insulin resistance or serum lipids in normal men. *Am J Hypertens.* 1996;9(4 Pt 1):317-22.
70. Inoue J, Cappuccio F, Sagnella G, et al. Glucose load and renal sodium handling in mild essential hypertension on different sodium intakes. *J Hum Hypertens.* 1996;10(8):523-9.
71. Ishimitsu T, Nishikimi T, Matsuoka H, et al. Behaviour of adrenomedullin during acute and chronic salt loading in normotensive and hypertensive subjects. *Clin Sci.* 1996;91(3):293-8.
72. Schorr U, Distler A, Sharma AM. Effect of sodium chloride- and sodium bicarbonate-rich mineral water on blood pressure and metabolic parameters in elderly normotensive individuals: A randomized double-blind crossover trial. *J Hypertens.* 1996;14(1):131-5.
73. Zoccali C, Mallamaci F, Cuzzola F, et al. Reproducibility of the response to short-term low salt intake in essential hypertension. *J Hypertens.* 1996;14(12):1455-9.
74. Cappuccio FP, Markandu ND, Carney C, et al. Double-blind randomised trial of modest salt restriction in older people. *Lancet.* 1997;350(9081):850-4.
75. Cutler JA. Effects of weight loss and sodium reduction intervention on blood pressure and hypertension incidence in overweight people with high-normal blood pressure: The trials of hypertension prevention, phase II. *Arch Intern Med.* 1997;157(6):657-67.
76. McCarron DA, Weder AB, Egan BM, et al. Blood pressure and metabolic responses to moderate sodium restriction in isradipine-treated hypertensive patients. *Am J Hypertens.* 1997;10(1):68-76.
77. Meland E, Laerum E, Aakvaag A, et al. Salt restriction: effects on lipids and insulin production in hypertensive patients. *Scand J Clin Lab Invest.* 1997;57(6):501-5.

78. Schorr U, Turan S, Distler A, et al. Relationship between ambulatory and resting blood pressure responses to dietary salt restriction in normotensive men. *J Hypertens*. 1997;15(8):845-9.
79. Yamamoto H. Randomized controlled trial of salt-restriction program for primary prevention of hypertension in the community. *Journal of the osaka city medical center*. 1997;46(3-4):255-67.
80. Foo M, Denver A, Coppack S, et al. Effect of salt-loading on blood pressure, insulin sensitivity and limb blood flow in normal subjects. *Clin Sci*. 1998;95(2):157-64.
81. Gomi T, Shibuya Y, Sakurai J, et al. Strict dietary sodium reduction worsens insulin sensitivity by increasing sympathetic nervous activity in patients with primary hypertension. *Am J Hypertens*. 1998;11(9):1048-55.
82. Herlitz H, Dahlöf B, Jonsson O, et al. Relationship between salt and blood pressure in hypertensive patients on chronic ACE-inhibition. *Blood pressure*. 1998;7(1):47-52.
83. Wing L, Arnolda L, Harvey P, et al. Low-dose diuretic and/or dietary sodium restriction when blood pressure is resistant to ACE inhibitor. *Blood pressure*. 1998;7(5-6):299-307.
84. Davrath L, Gotshall R, Tucker A, et al. Moderate sodium restriction does not alter lower body negative pressure tolerance. *Aviat Space Environ Med*. 1999;70(6):577-82.
85. Schorr U, Blaschke K, Beige J, et al. Angiotensinogen M235T variant and salt sensitivity in young normotensive Caucasians. *J Hypertens*. 1999;17(4):475-9.
86. Uzu T, Fujii T, Nishimura M, et al. Determinants of circadian blood pressure rhythm in essential hypertension. *Am J Hypertens*. 1999;12(1 Pt 1):35-9.
87. Boero R, Pignataro A, Bancalè E, et al. Metabolic effects of changes in dietary sodium intake in patients with essential hypertension. [Italian]. *Minerva Urol Nefrol*. 2000;52(1):13-6.
88. Ames RP. The effect of sodium supplementation on glucose tolerance and insulin concentrations in patients with hypertension and diabetes mellitus. *Am J Hypertens*. 2001;14(7 D):653-9.
89. Appel L, Espeland M, Easter L, et al. Effects of reduced sodium intake on hypertension control in older individuals: results from the Trial of Nonpharmacologic Interventions in the Elderly (TONE). *Arch Intern Med*. 2001;161(5):685-93.
90. Johnson AG, Nguyen TV, Davis D. Blood pressure is linked to salt intake and modulated by the angiotensinogen gene in normotensive and hypertensive elderly subjects. *J Hypertens*. 2001;19(6):1053-60.
91. Akita S, Sacks F, Svetkey L, et al. Effects of the Dietary Approaches to Stop Hypertension (DASH) diet on the pressure-natriuresis relationship. *Hypertension*. 2003;42(1):8-13.
92. Dishy V, Sofowora G, Imamura H, et al. Nitric oxide production decreases after salt loading but is not related to blood pressure changes or nitric oxide-mediated vascular responses. *J Hypertens*. 2003;21(1):153-7.
93. Nowson CA, Morgan TO, Gibbons C. Decreasing Dietary Sodium while Following a Self-Selected Potassium-Rich Diet Reduces Blood Pressure. *J Nutr*. 2003;133(12):4118-23.
94. Pechere-Bertschi A, Maillard M, Stalder H, et al. Renal hemodynamic and tubular responses to salt in women using oral contraceptives. *Kidney International*. 2003;64(4):1374-80.
95. Perry C, Palmer T, Cleland S, et al. Decreased insulin sensitivity during dietary sodium restriction is not mediated by effects of angiotensin II on insulin action. *Clin Sci*. 2003;105(2):187-94.
96. Beeks E, Klauw M, Kroon A, et al. Alpha-adducin Gly460Trp polymorphism and renal hemodynamics in essential hypertension. *Hypertension*. 2004;44(4):419-23.
97. Berge-Landry H, James G. Serum electrolyte, serum protein, serum fat and renal responses to a dietary sodium challenge: allostasis and allostatic load. *Ann Hum Biol*. 2004;31(4):477-87.
98. Gates P, Tanaka H, Hiatt W, et al. Dietary sodium restriction rapidly improves large elastic artery compliance in older adults with systolic hypertension. *Hypertension*. 2004;44(1):35-41.
99. Forrester T, Adeyemo A, Soarres-Wynter S, et al. A randomized trial on sodium reduction in two developing countries. *J Hum Hypertens*. 2005;19(1):55-60.
100. Swift PA, Markandu ND, Sagnella GA, et al. Modest salt reduction reduces blood pressure and urine protein excretion in black hypertensives: A randomized control trial. *Hypertension*. 2005;46(2):308-12.
101. Cappuccio F, Kerry S, Micah F, et al. A community programme to reduce salt intake and blood pressure in Ghana. *BMC public health*. 2006;6:13.
102. Ho J, Keogh J, Bornstein S, et al. Moderate weight loss reduces renin and aldosterone but does not influence basal or stimulated pituitary-adrenal axis function. *Horm Metab Res*. 2007;39(9):694-9.

103. Melander O, Woweren F, Frandsen E, et al. Moderate salt restriction effectively lowers blood pressure and degree of salt sensitivity is related to baseline concentration of renin and N-terminal atrial natriuretic peptide in plasma. *J Hypertens*. 2007;25(3):619-27.
104. Townsend R, Kapoor S, McFadden C. Salt intake and insulin sensitivity in healthy human volunteers. *Clin Sci*. 2007;113(3):141-8.
105. Jessani S, Hatcher J, Chaturvedi N, et al. Effect of low vs. high dietary sodium on blood pressure levels in a normotensive Indo-Asian population. *Am J Hypertens*. 2008;21(11):1238-44.
106. Tzemos N, Lim P, Wong S, et al. Adverse cardiovascular effects of acute salt loading in young normotensive individuals. *Hypertension*. 2008;51(6):1525-30.
107. Visser F, Boonstra A, Titia LA, et al. Renal response to angiotensin II is blunted in sodium-sensitive normotensive men. *Am J Hypertens*. 2008;21(3):323-8.
108. Dickinson K, Keogh J, Clifton P. Effects of a low-salt diet on flow-mediated dilatation in humans. *Am J Clin Nutr*. 2009;89(2):485-90.
109. He F, Marciniak M, Visagie E, et al. Effect of modest salt reduction on blood pressure, urinary albumin, and pulse wave velocity in white, black, and Asian mild hypertensives. *Hypertension*. 2009;54(3):482-8.
110. Meland E, Aamland A. Salt restriction among hypertensive patients: modest blood pressure effect and no adverse effects. *Scand J Prim Health Care*. 2009;27(2):97-103.
111. Paulsen L, Holst L, Bech J, et al. Glomerular filtration rate and blood pressure are unchanged by increased sodium intake in atorvastatin-treated healthy men. *Scand J Clin Lab Invest*. 2009;69(3):323-9.
112. Pimenta E, Gaddam KK, Oparil S, et al. Effects of dietary sodium reduction on blood pressure in subjects with resistant hypertension: Results from a randomized trial. *Hypertension*. 2009;54(3):475-81.
113. Weir MR, Yadao AM, Purkayastha D, et al. Effects of high- and low-sodium diets on ambulatory blood pressure in patients with hypertension receiving aliskiren. *J Cardiovasc Pharmacol Ther*. 2010;15(4):356-63.
114. Zanchi A, Maillard M, Jornayvaz F, et al. Effects of the peroxisome proliferator-activated receptor (PPAR)-gamma agonist pioglitazone on renal and hormonal responses to salt in diabetic and hypertensive individuals. *Diabetologia*. 2010;53(8):1568-75.
115. Starmans-Kool MJ, Stanton AV, Xu YY, et al. High dietary salt intake increases carotid blood pressure and wave reflection in normotensive healthy young men. *J Appl Physiol*. 2011;110(2):468-71.
116. Carey RM, Schoeffel CD, Gildea JJ, et al. Salt sensitivity of blood pressure is associated with polymorphisms in the sodium-bicarbonate cotransporter. *Hypertension*. 2012;60(5):1359-66.
117. Graffe CC, Bech JN, Pedersen EB. Effect of high and low sodium intake on urinary aquaporin-2 excretion in healthy humans. *Am J Physiol Renal Physiol*. 2012;302(2):F264-F75.
118. Bonfils P, Taskiran M, Damgaard M, et al. The influence of high versus low sodium intake on blood pressure and haemodynamics in patients with morbid obesity. *J Hypertens*. 2013;31(11):2220-9; discussion 9.
119. Mallamaci F, Leonardis D, Pizzini P, et al. Procalcitonin and the inflammatory response to salt in essential hypertension: a randomized cross-over clinical trial. *J Hypertens*. 2013;31(7):1424-30.
120. Allen AR, Gullixson LR, Wolhart SC, et al. Dietary sodium influences the effect of mental stress on heart rate variability: A randomized trial in healthy adults. *J Hypertens*. 2014;32(2):374-82.
121. Cavka A, Cosic A, Jukic I, et al. The role of cyclo-oxygenase-1 in high-salt diet-induced microvascular dysfunction in humans. *J Physiol*. 2015;593(24):5313-24.
122. Gijsbers L, Dower JI, Schalkwijk CG, et al. Effects of sodium and potassium supplementation on endothelial function: A fully controlled dietary intervention study. *Br J Nutr*. 2015;114(9):1419-26.
123. He FJ, Wu Y, Feng XX, et al. School based education programme to reduce salt intake in children and their families (School-EduSalt): Cluster randomised controlled trial. *BMJ*. 2015;350 (no pagination)(h770).
124. Pinjuh MN, Rumboldt M, Rumboldt Z. Emphasized warning reduces salt intake: A randomized controlled trial. *J Am Soc Hypertens*. 2015;9(3):214-20.
125. Matthews EL, Brian MS, Ramick MG, et al. High dietary sodium reduces brachial artery flow-mediated dilation in humans with salt-sensitive and salt-resistant blood pressure. *J Appl Physiol*. 2015; 118(12):1510-5.
126. Riphagen IJ, Gijsbers L, van Gastel MD, et al. Effects of potassium supplementation on markers of osmoregulation and volume regulation: results of a fully controlled dietary intervention study. *J Hypertens*. 2016;34(2):215-20.

127. Suckling RJ, He FJ, Markandu ND, et al. Modest salt reduction lowers blood pressure and albumin excretion in impaired glucose tolerance and type 2 diabetes mellitus: A randomized double-blind trial. *Hypertension*. 2016;67(6):1189-95.
128. Brian MS, Dalpiaz A, Matthews EL, et al. Dietary sodium and nocturnal blood pressure dipping in normotensive men and women. *J Hum Hypertens*. 2017;31(2):145-50.
129. Gefke M, Christensen NJ, Bech P, et al. Hemodynamic responses to mental stress during salt loading. *Clin Physiol Funct Imaging*. 2017;37(6):688-94.
130. Babcock MC, Brian MS, Watso JC, et al. Alterations in dietary sodium intake affect cardiovagal baroreflex sensitivity. *Am J Physiol Regul Integr Comp Physiol*. 2018;315(4):R688-R95.
131. Parvanova A, Trillini M, Podesta MA, et al. Moderate salt restriction with or without paricalcitol in type 2 diabetes and losartan-resistant macroalbuminuria (PROCEED): a randomised, double-blind, placebo-controlled, crossover trial. *Lancet Diabetes Endocrinol*. 2018;6(1):27-40.
132. Rorije NMG, Olde Engberink RHG, Chahid Y, et al. Microvascular Permeability after an Acute and Chronic Salt Load in Healthy Subjects: A Randomized Open-label Crossover Intervention Study. *Anesthesiology*. 2018;128(2):352-60.
133. Wang Y, Chu C, Wang KK, et al. Effect of Salt Intake on Plasma and Urinary Uric Acid Levels in Chinese Adults: An Interventional Trial. *Sci Rep*. 2018;8(1):1434.
